# Supplementary material for: Reactivity of uranium(iii) with H2E (E = S, Se, Te): synthesis of a series of mononuclear and dinuclear uranium(iv) hydrochalcogenido complexes
Source: Royal Society of Chemistry journal article supplement (doi:10.1039/c4sc02602k), 2014-09-29
Supplement: c4sc02602k1.pdf [file c4sc02602k1.pdf]

## Supporting Information for

# Reactivity of uranium(III) with H<sub>2</sub>E (E = S, Se, Te): Synthesis of a series of mononuclear and dinuclear uranium(IV) hydrochalcogenido complexes

*Sebastian M. Franke, Michael W. Rosenzweig, Frank W. Heinemann, and  
Karsten Meyer\**

*Department of Chemistry and Pharmacy, Inorganic Chemistry, Friedrich-Alexander University of Erlangen-  
Nürnberg (FAU), Egerlandstrasse 1, 91058 Erlangen, Bavaria, Germany*

## Table of contents

|                                                                                                              |     |
|--------------------------------------------------------------------------------------------------------------|-----|
| <b>Experimental Section</b>                                                                                  | S3  |
| General Methods                                                                                              | S3  |
| Synthesis of [(( <sup>Ad</sup> ArO) <sub>3</sub> N)U(DME)(SH)] ( <b>1-SH</b> )                               | S4  |
| Synthesis of [(( <sup>Ad</sup> ArO) <sub>3</sub> N)U(DME)(SeH)] ( <b>1-SeH</b> )                             | S4  |
| Synthesis of [(( <sup>Ad</sup> ArO) <sub>3</sub> N)U(DME)(SeD)] ( <b>1-SeD</b> )                             | S4  |
| Synthesis of [(( <sup>Ad</sup> ArO) <sub>3</sub> N)U(DME)(TeH)] ( <b>1-TeH</b> )                             | S4  |
| Synthesis of [{{{( <sup>Ad</sup> ArO) <sub>3</sub> N}U} <sub>2</sub> (μ-SH) <sub>2</sub> ] ( <b>2-SH</b> )   | S5  |
| Synthesis of [{{{( <sup>Ad</sup> ArO) <sub>3</sub> N}U} <sub>2</sub> (μ-SeH) <sub>2</sub> ] ( <b>2-SeH</b> ) | S5  |
| Synthesis of [{{{( <sup>Ad</sup> ArO) <sub>3</sub> N}U} <sub>2</sub> (μ-TeH) <sub>2</sub> ] ( <b>2-TeH</b> ) | S5  |
| <b>X-Ray Crystal Structure Determination</b>                                                                 | S6  |
| Crystallographic Details                                                                                     | S6  |
| Crystal Data and Structure Refinement for <b>1-SH</b>                                                        | S9  |
| Crystal Data and Structure Refinement for <b>1-SeH</b>                                                       | S10 |
| Crystal Data and Structure Refinement for <b>1-TeH</b>                                                       | S12 |
| Crystal Data and Structure Refinement for <b>2-SH</b>                                                        | S14 |
| Crystal Data and Structure Refinement for <b>2-SeH</b>                                                       | S15 |
| Crystal Data and Structure Refinement for <b>2-TeH</b>                                                       | S18 |

|                                                      |     |
|------------------------------------------------------|-----|
| <b><math>^1\text{H}</math> NMR Spectroscopy</b>      | S19 |
| <b><math>^2\text{D}</math> NMR Spectroscopy</b>      | S22 |
| <b><math>^{77}\text{Se}</math> NMR Spectroscopy</b>  | S23 |
| <b><math>^{125}\text{Te}</math> NMR Spectroscopy</b> | S23 |
| <b>SQUID Magnetization Data</b>                      | S24 |
| <b>IR Spectroscopy</b>                               | S26 |
| <b>UV/vis Spectroscopy</b>                           | S29 |
| <b>Cyclic Voltammetry</b>                            | S31 |
| <b>References</b>                                    | S32 |

## Experimental Section

**General Methods.** All experiments were performed under a dry nitrogen atmosphere using standard Schlenk techniques or an MBraun inert-gas glovebox. All solvents were purified using a two-column solid-state purification system (Glasscontour System, Irvine, CA) and transferred to the glovebox without exposure to air, unless otherwise indicated.

Magnetism data of crystalline powdered samples (20 – 30 mg) were recorded with a SQUID magnetometer (Quantum Design) at 10 kOe (2 – 300 K for **1-EH** and **2-EH**; E = S, Se, Te). Values of the magnetic susceptibility were calculated per uranium center and corrected for the underlying diamagnetic increment ( $\chi_{\text{dia}} = -663.7 \times 10^{-6} \text{ cm}^3 \text{ mol}^{-1}$  (**1-SH**),  $-671.7 \times 10^{-6} \text{ cm}^3 \text{ mol}^{-1}$  (**1-SeH**),  $-696.0 \times 10^{-6} \text{ cm}^3 \text{ mol}^{-1}$  (**1-TeH**),  $-601.2 \times 10^{-6} \text{ cm}^3 \text{ mol}^{-1}$  (**2-SH**),  $-609.2 \times 10^{-6} \text{ cm}^3 \text{ mol}^{-1}$  (**2-SeH**),  $-623.5 \times 10^{-6} \text{ cm}^3 \text{ mol}^{-1}$  (**2-TeH**)) by using tabulated Pascal constants and the effect of the blank sample holders (gelatin capsule/ straw).<sup>1</sup> Samples used for magnetization measurements were recrystallized multiple times and checked for chemical composition and purity by elemental analysis (C, H, N and S) and <sup>1</sup>H NMR spectroscopy. Data reproducibility was also carefully checked on independently synthesized samples.

<sup>1</sup>H NMR spectra were recorded on JEOL 270 and 400 MHz instruments, operating at the respective frequencies of 269.714 and 400.178 MHz with a probe temperature of 23 °C in benzene-*d*<sub>6</sub>. Chemical shifts were referenced to *protio* solvent impurities ( $\delta = 7.16$  (benzene-*d*<sub>6</sub>),  $\delta = 8.74$  (pyridine-*d*<sub>5</sub>)) and are reported in parts per million (ppm). Furthermore, additional NMR spectra were recorded on a Varian VNMRS 400 (<sup>1</sup>H 399.5 MHz; <sup>2</sup>H{<sup>1</sup>H} 61.32 MHz; <sup>77</sup>Se{<sup>1</sup>H} 66.21 MHz; <sup>125</sup>Te{<sup>1</sup>H} 126.0 MHz) spectrometer. The spectra were referenced internally to the residual protic solvent (<sup>1</sup>H) or the naturally occurring deuterium in the protic solvent (<sup>2</sup>H). <sup>77</sup>Se{<sup>1</sup>H} NMR spectra were referenced externally relative to Me<sub>2</sub>Se. <sup>125</sup>Te{<sup>1</sup>H} NMR spectra were referenced externally relative to Me<sub>2</sub>Te. All spectra were recorded at 303 K unless otherwise stated. Results from elemental analysis were obtained from the Analytical Laboratories at the Friedrich-Alexander-University Erlangen-Nürnberg (Erlangen, Germany) on Euro EA 3000.

**Starting Materials.** Precursor complexes [(U<sub>3</sub>(dioxane)<sub>1.5</sub>)] and [U(N(SiMe<sub>3</sub>)<sub>2</sub>)<sub>3</sub>] were prepared as described by Kiplinger and coworkers.<sup>2</sup> The tris(2-hydroxy-3-adamantyl-5-methylbenzyl)amine ligand was synthesized from a modified literature procedure.<sup>3</sup> The uranium starting material [((<sup>Ad</sup>ArO)<sub>3</sub>N)U(DME)] was synthesized according to literature procedures.<sup>4</sup> Aluminium selenide (≥ 99 %) was purchased from Alfa Aesar, aluminum telluride (≥ 99.5 %) was purchased from Materion and both were used as received. Anhydrous 1,2-dimethoxyethane (≥ 99 %), THF (≥ 99.9 %), and benzene (99.8 %) were purchased from Sigma-Aldrich. THF and 1,2-dimethoxyethane were further dried by distilling over sodium benzophenone. Hydrogen sulfide (0.8 M in THF) was purchased from Sigma-Aldrich and used without further purification. Hydrogen selenide, deuterium selenide, and

hydrogen telluride were synthesized from  $\text{Al}_2\text{E}_3$  (E = Se, Te) and dried according to a modified literature procedure<sup>5</sup> and were condensed into THF in a schlenk flask at  $-70\text{ }^\circ\text{C}$ . In order to avoid hydrogen chloride contamination of the THF solution, a 4 M solution of  $\text{H}_2\text{SO}_4$  in degassed water was used for the preparation of  $\text{H}_2\text{Se}$  and  $\text{H}_2\text{Te}$  instead. Additionally, the gas was passed through a cooling trap that was kept at  $-10\text{ }^\circ\text{C}$  from the outside, instead of drying with  $\text{CaCl}_2$  and  $\text{P}_4\text{O}_{10}$ . All three gases were stored under an inert atmosphere at  $-35\text{ }^\circ\text{C}$ . It should be noted that – in contrast to  $\text{H}_2\text{Se}$  and  $\text{D}_2\text{Se}$  –  $\text{H}_2\text{Te}$  cannot be stored indefinitely under these conditions and decomposes within two to three weeks. **Warning!  $\text{H}_2\text{S}$ ,  $\text{H}_2\text{Se}$ , and  $\text{H}_2\text{Te}$  are extremely toxic and odoriferous. Any reactions involving these gases should be carried out in a well-ventilated fumehood or glovebox.**

**Synthesis of  $[(^{\text{Ad}}\text{ArO})_3\text{N}]\text{U}(\text{DME})(\text{SH})$  (1-SH).** A vial was charged with  $[(^{\text{Ad}}\text{ArO})_3\text{N}]\text{U}(\text{DME})$  (100 mg, 0.09 mmol) in THF and a solution of  $\text{H}_2\text{S}$  in THF (0.8 M, 0.09 mmol, 112  $\mu\text{mol}$ ) was added dropwise. The solution immediately turned green and after 2 min. a green precipitate formed. The reaction mixture was stirred for another 1 h, then filtered and the volatiles were removed *in vacuo*. Recrystallization from diffusing *n*-hexane into a concentrated DME solution yielded the pure product. Yield: 72 mg (0.063 mmol, 70%).  $^1\text{H}$  NMR (270 MHz,  $\text{C}_5\text{D}_5\text{N}$ ):  $\delta$  [ppm] = 9.78, 8.32, 3.53, 3.31, 3.17, 2.65, 2.32,  $-15.21$ ,  $-41.80$  (1H, SH). Elemental analysis (%) calcd. for  $[(^{\text{Ad}}\text{ArO})_3\text{N}]\text{U}(\text{DME})(\text{SH})$ , C 61.20, H 6.82, N 1.23, S 2.82; found C 61.47, H 7.21, N 1.24, S 2.39.

**Synthesis of  $[(^{\text{Ad}}\text{ArO})_3\text{N}]\text{U}(\text{DME})(\text{SeH})$  (1-SeH).** A vial was charged with  $[(^{\text{Ad}}\text{ArO})_3\text{N}]\text{U}(\text{DME})$  (100 mg, 0.09 mmol) in THF and a solution of  $\text{H}_2\text{Se}$  in THF was added dropwise until the solution turned green. After 2 min. a green precipitate formed and the reaction mixture was stirred for another 1 h, then filtered and the volatiles were removed *in vacuo*. Recrystallization from diffusing *n*-hexane into a concentrated DME solution yielded the pure product. Yield: 76.5 mg (0.070 mmol, 78%).  $^1\text{H}$  NMR (270 MHz,  $\text{C}_5\text{D}_5\text{N}$ ):  $\delta$  [ppm] = 10.13, 9.58, 3.51, 3.46, 3.30, 2.87, 2.43, 2.33,  $-18.36$ ,  $-62.86$  (1H, SeH).  $^{77}\text{Se}\{^1\text{H}\}$  NMR (67 MHz,  $\text{C}_5\text{D}_5\text{N}$ ):  $\delta$  [ppm] = 813.9 (1 Se, U–Se). Elemental analysis (%) calcd. for  $[(^{\text{Ad}}\text{ArO})_3\text{N}]\text{U}(\text{DME})(\text{SeH})$ , C 58.78, H 6.55, N 1.18; found C 58.89, H 6.94, N 1.11.

**Synthesis of  $[(^{\text{Ad}}\text{ArO})_3\text{N}]\text{U}(\text{DME})(\text{SeD})$  (1-SeD).** A vial was charged with  $[(^{\text{Ad}}\text{ArO})_3\text{N}]\text{U}(\text{DME})$  (100 mg, 0.09 mmol) in THF and a solution of  $\text{D}_2\text{Se}$  in THF was added dropwise until the solution turned green. After 2 min. a green precipitate formed and the reaction mixture was stirred for another 1 h, then filtered and the volatiles were removed *in vacuo*. Yield: 56 mg (0.047 mmol, 52%).  $^1\text{H}$  NMR (270 MHz,  $\text{C}_5\text{D}_5\text{N}$ ):  $\delta$  [ppm] = 10.17, 9.72, 3.52, 3.49, 3.29, 2.91, 2.44, 2.33,  $-19.12$ . Elemental analysis (%) calcd. for  $[(^{\text{Ad}}\text{ArO})_3\text{N}]\text{U}(\text{DME})(\text{SeD}) \times \text{THF}$ , C 59.18, H 6.89, N 1.11; found C 59.42, H 6.66, N 1.33.

**Synthesis of  $[((^{Ad}ArO)_3N)U(DME)(TeH)]$  (1-TeH).** A vial was charged with  $[((^{Ad}ArO)_3N)U(DME)]$  (100 mg, 0.09 mmol) in THF and cooled to  $-35\text{ }^{\circ}\text{C}$ . A solution of  $H_2Te$  in cold THF was then added until the solution turned green. The reaction mixture was stirred for another 2 min. and the volatiles were removed *in vacuo*. The crude product was dissolved in DME and stirred for 15 minutes, during which a light green precipitate formed. The reaction mixture was filtered and dried *in vacuo*. Recrystallization from diffusing *n*-hexane into a concentrated benzene/DME (70:30) solution yielded the pure product. Yield: 48.6 mg (0.040 mmol, 44 %).  $^1H$  NMR (270 MHz,  $C_5D_5N$ ):  $\delta$  [ppm] = 20.26, 11.53, 10.70, 4.01, 3.51, 3.36, 3.28, 2.75, 2.48, 2.38, 1.23,  $-23.28$ ,  $-85.49$  (1H, TeH).  $^{125}Te\{^1H\}$  NMR (126 MHz,  $C_5D_5N$ ):  $\delta$  [ppm] = 552.5 (1 Te, U-Te). Elemental analysis (%) calcd. for  $[((^{Ad}ArO)_3N)U(DME)(TeH)]$ , C 56.46, H 6.29, N 1.14; found C 56.42, H 6.29, N 1.21.

**Synthesis of  $[{[(^{Ad}ArO)_3N]U}_2(\mu-SH)_2]$  (2-SH).** A vial was charged with  $[((^{Ad}ArO)_3N)U(DME)]$  (100 mg, 0.09 mmol) in THF and a solution of  $H_2S$  in THF (0.8 M, 0.09 mmol, 112  $\mu$ mol) was added dropwise. The solution immediately turned green and after 2 min. a green precipitate formed. The reaction mixture was stirred for another 1 h, then filtered and the volatiles were removed *in vacuo*. Recrystallization from diffusing *n*-hexane into a concentrated benzene solution yielded the pure product. Yield: 67.5 mg (0.064 mmol, 72 %).  $^1H$  NMR (270 MHz,  $C_6D_6$ ):  $\delta$  [ppm] = 60.43, 56.41, 33.21, 17.25, 16.46, 11.68, 10.36,  $-0.44$ ,  $-1.01$ ,  $-10.20$ ,  $-12.05$ ,  $-15.61$ ,  $-17.71$ ,  $-31.99$ ,  $-50.05$ ,  $-52.75$ ,  $-79.70$ . Elemental analysis (%) calcd. for  $[{[(^{Ad}ArO)_3N]U}_2(\mu-SH)_2] \times C_6H_6$ , C 62.97, H 6.49, N 1.26, S 2.95; found C 62.92, H 6.40, N 1.26, S 2.14.

**Synthesis of  $[{[(^{Ad}ArO)_3N]U}_2(\mu-SeH)_2]$  (2-SeH).** A vial was charged with  $[((^{Ad}ArO)_3N)U(DME)]$  (100 mg, 0.09 mmol) in THF and a solution of  $H_2Se$  in THF was added dropwise until the solution turned green. After 2 min. a green precipitate formed and the reaction mixture was stirred for another 1 h, then filtered and the volatiles were removed *in vacuo*. Recrystallization from diffusing *n*-hexane into a concentrated benzene solution yielded the pure product. Yield: 76.4 mg (0.065 mmol, 72 %).  $^1H$  NMR (270 MHz,  $C_6D_6$ ):  $\delta$  [ppm] = 64.29, 60.12, 35.11, 18.40, 17.62, 12.47, 11.12,  $-0.82$ ,  $-1.86$ ,  $-11.28$ ,  $-12.90$ ,  $-16.64$ ,  $-18.98$ ,  $-34.09$ ,  $-53.26$ ,  $-55.15$ ,  $-82.51$ . Elemental analysis (%) calcd. for  $[((^{Ad}ArO)_3N)U(DME)(SeH)]$ , C 59.23, H 6.17, N 1.28; found C 59.57, H 5.97, N 1.29.

**Synthesis of  $[{[(^{Ad}ArO)_3N]U}_2(\mu-TeH)_2]$  (2-TeH).** A vial was charged with  $[((^{Ad}ArO)_3N)U(DME)]$  (100 mg, 0.09 mmol) in THF and cooled to  $-35\text{ }^{\circ}\text{C}$ . A solution of  $H_2Te$  in cold THF was then added until the solution turned green. The reaction mixture was stirred for another 2 min. and the volatiles were removed *in vacuo*. The crude product was dissolved in DME and stirred for 15 minutes, during which a light green precipitate formed. The reaction mixture was filtered and dried *in vacuo*. Recrystallization from diffusing *n*-hexane into a concentrated benzene solution yielded the pure product. Yield: 59 mg (0.048 mmol, 53 %).  $^1H$  NMR (270 MHz,  $C_6D_6$ ):  $\delta$  [ppm] = 69.02, 64.95, 37.53,

19.53, 18.84, 13.30, 12.10, 5.36, 2.96, -0.52, -1.65, -3.17, -12.96, -13.89, -17.63, -20.45, -36.13, -57.18, -58.20, -85.58. Elemental analysis (%) calcd. for  $[\{((^{\text{Ad}}\text{ArO})_3\text{N})\text{U}\}_2(\mu\text{-TeH})_2] \times \text{C}_6\text{H}_6$ , C 57.88, H 5.97, N 1.18; found C 57.94, H 6.26, N 1.08.

## X-Ray Crystal Structure Determinations

CCDC-1020771 (for **1-SH**), CCDC-1020772 (for **1-SeH**), CCDC-1020773 (for **1-TeH**), CCDC-1020774 (for **2-SH**), CCDC-1020775 (for **2-SeH**), and CCDC-1020776 (for **2-TeH**) contain the supplementary crystallographic data for this paper. This data can be obtained free of charge via <http://www.ccdc.cam.ac.uk/products/csd/request/>

(or from Cambridge Crystallographic Data Centre, 12 Union Road, Cambridge, CB2 1EZ, UK. fax: ++44-1223-336-033; e-mail: [deposit@ccdc.cam.ac.uk](mailto:deposit@ccdc.cam.ac.uk)).

**Crystallographic Details.** Green prisms of complexes **1-SH** and **1-SeH** grown from diffusion of *n*-hexane into a concentrated solution of DME, green blocks of **1-TeH** grown from diffusion of *n*-hexane into a concentrated benzene/DME (70:30) solution, and green to yellow blocks of complexes **2-EH** (E = S, Se, Te) grown from diffusion of *n*-hexane into a concentrated benzene solution were coated with isobutylene oil on a microscope slide. Intensity data were collected using  $\text{MoK}_\alpha$  radiation ( $\lambda = 0.71073 \text{ \AA}$ ) either on a Bruker-Nonius KappaCCD (graphite monochromator) for compounds **1-SH** (150 K), **2-SeH** (100 K), and **2-TeH** (150 K), or at 100 K on a Bruker-SMART APEX2 (graphite monochromator) for compounds **1-SeH**, **1-TeH**, and **2-SH**. Data were corrected for Lorentz and polarization effects, semi-empirical absorption corrections were performed on the basis of multiple scans using *SADABS*.<sup>6</sup> All structures were solved by direct methods and refined by full-matrix least-squares procedures on  $F^2$  using *SHELXTL NT* 6.12.<sup>7</sup> If not stated otherwise, all hydrogen atoms were placed in positions of optimized geometry, their isotropic displacement parameters were tied to those of the corresponding carrier atoms by a factor of 1.2 or 1.5.

Compound **1-SH** crystallized with one molecule of DME per formula unit. The position of the sulphur bound H atom H1S was derived from a difference fourier synthesis and allowed to ride on the S atom. All other hydrogen atoms were placed in positions of optimized geometry.

The asymmetric unit of the cell in compound **1-SeH** contained two independent molecules of the complex and two molecules of benzene. Both solvent molecules were disordered. Two alternative orientations were refined resulting in site occupancies of 32.9(6) and 67.1(6) % for the atoms C201 – C206 and C211 – C216, respectively and of 56.5(6) and 43.5(6) % for the atoms C301 – C306 and C311 – C316. SIMU restraints were applied in the refinement of the disordered benzenes.

The tentative position of the Te bound hydrogen H1 in compound **1-TeH** was taken from a difference fourier and it was subsequently treated using a riding model. All other hydrogen atoms were placed in positions of optimized geometry.

Compound **2-SH** crystallized with a total of 2.25 molecules of benzene and half a molecule of *n*-hexane. The 0.25 benzene is situated on a crystallographic inversion center and is occupied by only 50 %. The *n*-hexane molecule is situated on a crystallographic inversion center. The tentative position of the S bound hydrogen atoms H1S and H2S were taken from a difference fourier and they were subsequently treated using a riding model. All other hydrogen atoms were placed in positions of optimized geometry.

Compound **2-SeH** crystallized with a total of 2.5 molecules of benzene and 0.5 molecules of *n*-hexane. The two half molecules were situated on crystallographic inversion centres. SIMU and ISOR restraints were applied in the refinement of the half benzene molecule (C401 – C403). Treatment of hydrogen atoms: The positions of the two hydrogen atoms attached to the Se atoms were derived from a difference fourier synthesis and their positional parameters were refined. All other hydrogen atoms were placed in positions of optimized geometry.

The dinuclear complex molecule **2-TeH** was strongly disordered around one uranium centre. Two alternative orientations of the ligand around U2 were refined, including two alternative sites for U2, Te1 and Te2. The corresponding site occupancies turned out to be 50 % each. The compound crystallized with a total of 6.65 molecules of benzene, 0.35 molecules of *n*-hexane, and 0.35 of a putative water molecule. One half benzene molecule was situated on a crystallographic inversion centre (C401 – C403), another benzene was occupied by only 50 % (C901 – C906). One benzene molecule (C801 – C806) shares its site with a *n*-hexane molecule (C811 – C816) in a ratio of 65 : 35 %. One remaining significant residual electron density maximum was attributed to a putative water molecule of 35 % occupancy as the compound was extremely sensitive to moisture and air. DFIX restraints were applied in the refinement of the Te – H and the O – H distances. SIMU and ISOR restraints were applied in the refinement of the disordered parts of the complex molecule as well as for the solvent molecules. Treatment of hydrogen atoms: The positions of the two hydrogen atoms attached to the Te atoms were derived from a difference fourier synthesis as well as tentative positions for the hydrogen atoms of the putative water molecule. These hydrogens were subsequently refined using a riding model.

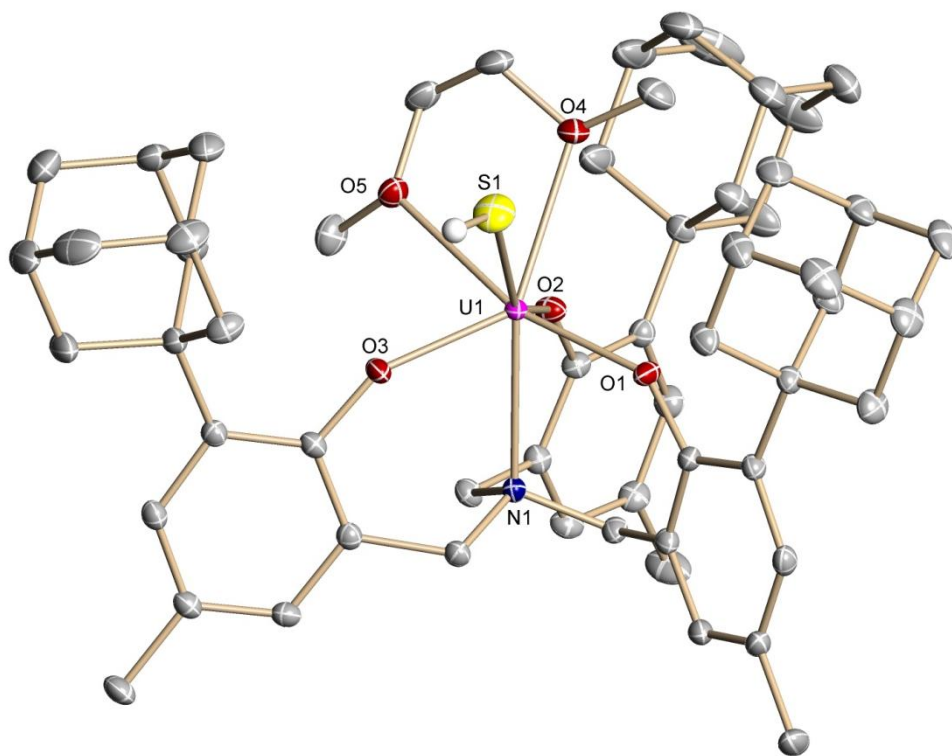

**Figure S1.** Molecular structure of **1-SH** with atom numbering scheme. Non-chalcogen bound H-atoms and co-crystallized solvent molecules are omitted for clarity. Thermal ellipsoids are at 50% probability.

## Crystal data and structure refinement for 1-SH.

|                                   |                                                                                                               |
|-----------------------------------|---------------------------------------------------------------------------------------------------------------|
| Identification code               | sf01                                                                                                          |
| Empirical formula                 | C <sub>62</sub> H <sub>87</sub> N O <sub>7</sub> S U                                                          |
| Formula weight                    | 1228.42 g/mol                                                                                                 |
| Temperature                       | 150(2) K                                                                                                      |
| Wavelength                        | 0.71073 Å                                                                                                     |
| Crystal system, space group       | Triclinic, P-1                                                                                                |
| Unit cell dimensions              | a = 14.4228(2) Å   α = 112.831(3)°<br>b = 14.8678(5) Å   β = 96.488(4)°<br>c = 15.4212(9) Å   γ = 108.933(2)° |
| Volume                            | 2772.59(19) Å <sup>3</sup>                                                                                    |
| Z, Calculated density             | 2, 1.471 Mg/m <sup>3</sup>                                                                                    |
| Absorption coefficient            | 3.019 mm <sup>-1</sup>                                                                                        |
| F(000)                            | 1260                                                                                                          |
| Crystal size                      | 0.30 x 0.28 x 0.11 mm <sup>3</sup>                                                                            |
| Theta range for data collection   | 3.80 to 28.70°                                                                                                |
| Limiting indices                  | -19 ≤ h ≤ 19, -20 ≤ k ≤ 20, -20 ≤ l ≤ 20                                                                      |
| Reflections collected / unique    | 112535 / 14282 [R(int) = 0.0318]                                                                              |
| Completeness to theta = 28.70     | 99.7 %                                                                                                        |
| Absorption correction             | Semi-empirical from equivalents                                                                               |
| Max. and min. transmission        | 0.746 and 0.554                                                                                               |
| Refinement method                 | Full-matrix least-squares on F <sup>2</sup>                                                                   |
| Data / restraints / parameters    | 14282 / 0 / 656                                                                                               |
| Goodness-of-fit on F <sup>2</sup> | 1.153                                                                                                         |
| Final R indices [I > 2σ(I)]       | R1 = 0.0189, wR2 = 0.0450                                                                                     |
| R indices (all data)              | R1 = 0.0261, wR2 = 0.0492                                                                                     |
| Largest diff. peak and hole       | 2.098 and -1.042 e.Å <sup>-3</sup>                                                                            |

**Crystal data and structure refinement for 1-SeH.**

|                                   |                                                                                                          |
|-----------------------------------|----------------------------------------------------------------------------------------------------------|
| Identification code               | sf02                                                                                                     |
| Empirical formula                 | C <sub>64</sub> H <sub>83</sub> N O <sub>5</sub> Se U                                                    |
| Formula weight                    | 1263.30 g/mol                                                                                            |
| Temperature                       | 100(2) K                                                                                                 |
| Wavelength                        | 0.71073 Å                                                                                                |
| Crystal system, space group       | Triclinic, P-1                                                                                           |
| Unit cell dimensions              | a = 16.827(1) Å   α = 88.022(3)°<br>b = 17.007(1) Å   β = 80.746(3)°<br>c = 19.804(2) Å   γ = 82.903(3)° |
| Volume                            | 5550.0(6) Å <sup>3</sup>                                                                                 |
| Z, Calculated density             | 4, 1.512 Mg/m <sup>3</sup>                                                                               |
| Absorption coefficient            | 3.631 mm <sup>-1</sup>                                                                                   |
| F(000)                            | 2560                                                                                                     |
| Crystal size                      | 0.52 x 0.30 x 0.22 mm <sup>3</sup>                                                                       |
| Theta range for data collection   | 2.58 to 27.10°                                                                                           |
| Limiting indices                  | -21 ≤ h ≤ 21, -21 ≤ k ≤ 21, -25 ≤ l ≤ 25                                                                 |
| Reflections collected / unique    | 158317 / 24462 [R(int) = 0.0439]                                                                         |
| Completeness to theta = 27.10     | 99.8 %                                                                                                   |
| Absorption correction             | Semi-empirical from equivalents                                                                          |
| Max. and min. transmission        | 0.421 and 0.305                                                                                          |
| Refinement method                 | Full-matrix least-squares on F <sup>2</sup>                                                              |
| Data / restraints / parameters    | 24462 / 252 / 1371                                                                                       |
| Goodness-of-fit on F <sup>2</sup> | 1.047                                                                                                    |
| Final R indices [I > 2σ(I)]       | R1 = 0.0354, wR2 = 0.0813                                                                                |
| R indices (all data)              | R1 = 0.0463, wR2 = 0.0867                                                                                |
| Largest diff. peak and hole       | 4.391 and -1.842 e. Å <sup>-3</sup>                                                                      |

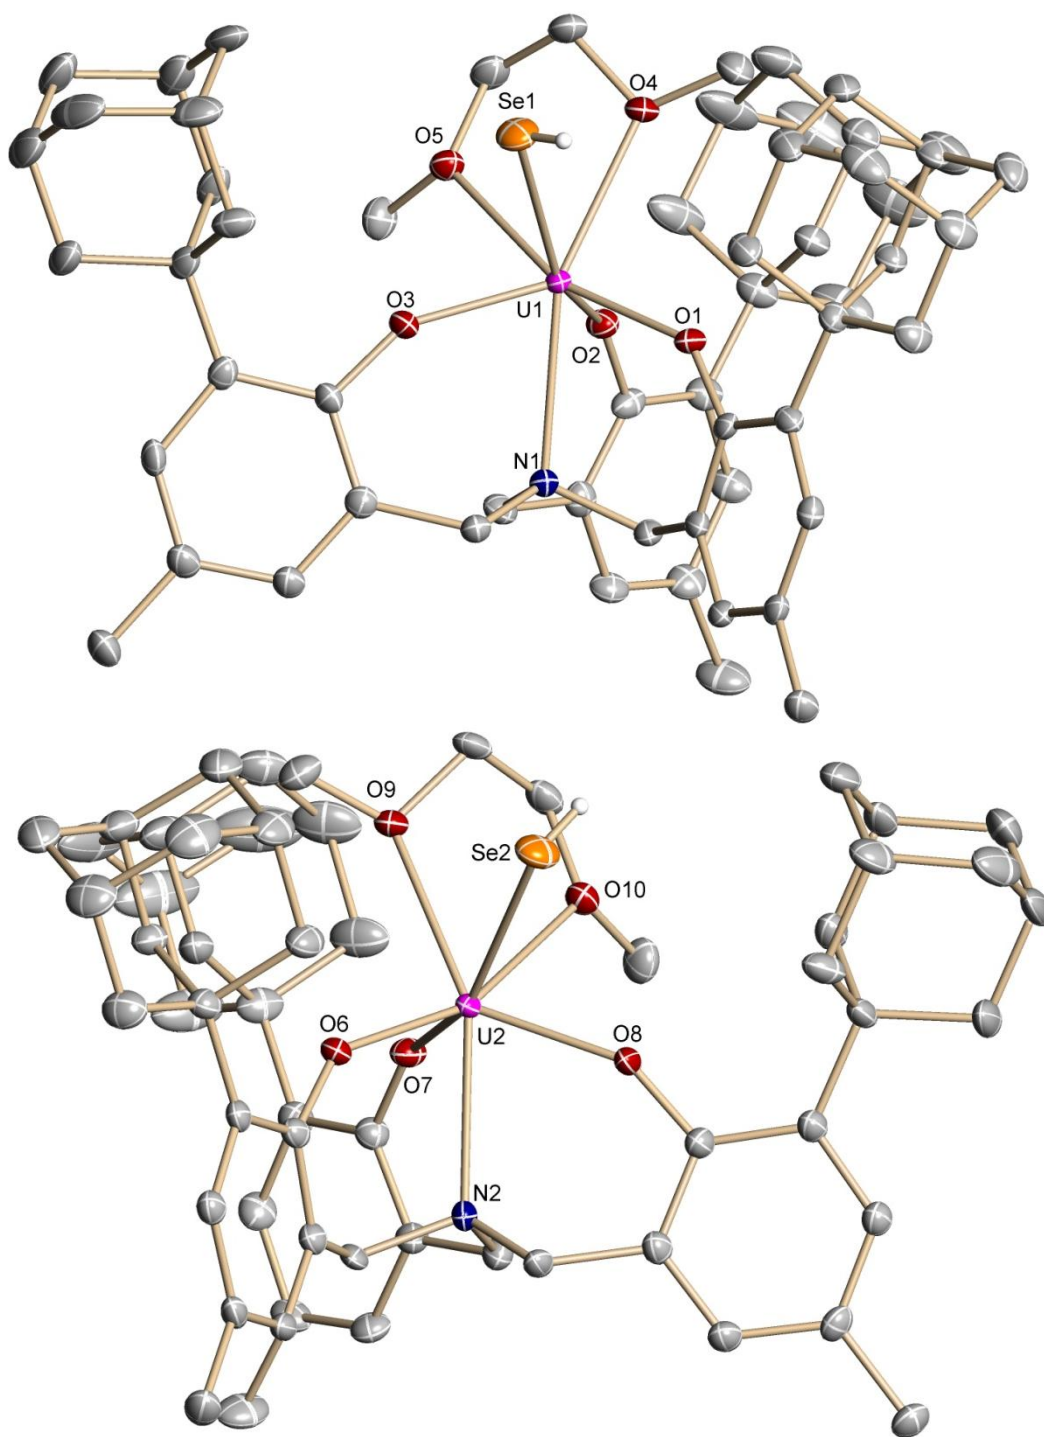

**Figure S2.** Molecular structures of two crystallographically independent molecules of **1-SeH** (**A**, top; **B**, bottom) with atom numbering scheme. Non-chalcogen bound H-atoms and co-crystallized solvent molecules are omitted for clarity. Thermal ellipsoids are at 50% probability.

**Table S1.** Selected bond distances (Å) and angles (°) for complexes **1-SeH A** and **1-SeH B**.

| Structural Parameters | 1-SeH A            | 1-SeH B            |
|-----------------------|--------------------|--------------------|
| U–O <sub>avg.</sub>   | 2.170              | 2.161              |
| U–O <sub>DME</sub>    | 2.599(3), 2.579(3) | 2.598(3), 2.577(3) |
| U–N                   | 2.605(3)           | 2.606(3)           |
| U–E                   | 2.936(1)           | 2.936(1)           |
| N–U–E                 | 133.44(7)          | 132.57(7)          |

**Crystal data and structure refinement for 1-TeH.**

|                                   |                                                                                                                 |
|-----------------------------------|-----------------------------------------------------------------------------------------------------------------|
| Identification code               | sf03                                                                                                            |
| Empirical formula                 | C <sub>58</sub> H <sub>77</sub> N O <sub>5</sub> Te U                                                           |
| Formula weight                    | 1233.84 g/mol                                                                                                   |
| Temperature                       | 100(2) K                                                                                                        |
| Wavelength                        | 0.71073 Å                                                                                                       |
| Crystal system, space group       | Triclinic, P-1                                                                                                  |
| Unit cell dimensions              | a = 11.2439(15) Å   α = 102.273(4)°<br>b = 12.9994(17) Å   β = 101.519(4)°<br>c = 18.636(3) Å   γ = 100.806(4)° |
| Volume                            | 2531.8(6) Å <sup>3</sup>                                                                                        |
| Z, Calculated density             | 2, 1.618 Mg/m <sup>3</sup>                                                                                      |
| Absorption coefficient            | 3.820 mm <sup>-1</sup>                                                                                          |
| F(000)                            | 1232                                                                                                            |
| Crystal size                      | 0.45 x 0.20 x 0.16 mm <sup>3</sup>                                                                              |
| Theta range for data collection   | 2.20 to 28.70°                                                                                                  |
| Limiting indices                  | -15 ≤ h ≤ 15, -17 ≤ k ≤ 17, -25 ≤ l ≤ 25                                                                        |
| Reflections collected / unique    | 152787 / 13024 [R(int) = 0.0310]                                                                                |
| Completeness to theta = 27.10     | 99.9 %                                                                                                          |
| Absorption correction             | Semi-empirical from equivalents                                                                                 |
| Max. and min. transmission        | 0.746 and 0.522                                                                                                 |
| Refinement method                 | Full-matrix least-squares on F <sup>2</sup>                                                                     |
| Data / restraints / parameters    | 13024 / 0 / 600                                                                                                 |
| Goodness-of-fit on F <sup>2</sup> | 1.076                                                                                                           |
| Final R indices [I > 2σ(I)]       | R1 = 0.0205, wR2 = 0.0514                                                                                       |
| R indices (all data)              | R1 = 0.0215, wR2 = 0.0518                                                                                       |
| Largest diff. peak and hole       | 2.976 and -1.403 e. Å <sup>-3</sup>                                                                             |

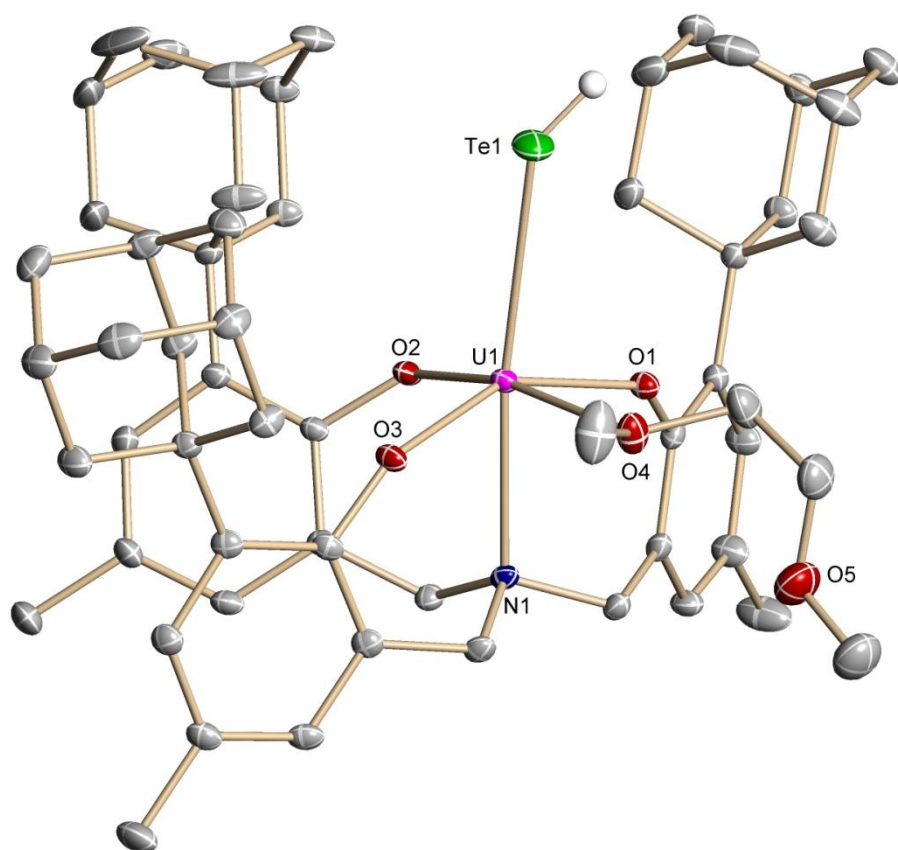

**Figure S3.** Molecular structures of **1-TeH** (top) and **2-SH** (bottom) with atom numbering scheme. Non-chalcogen bound H-atoms and co-crystallized solvent molecules are omitted for clarity. Thermal ellipsoids are at 50% probability.

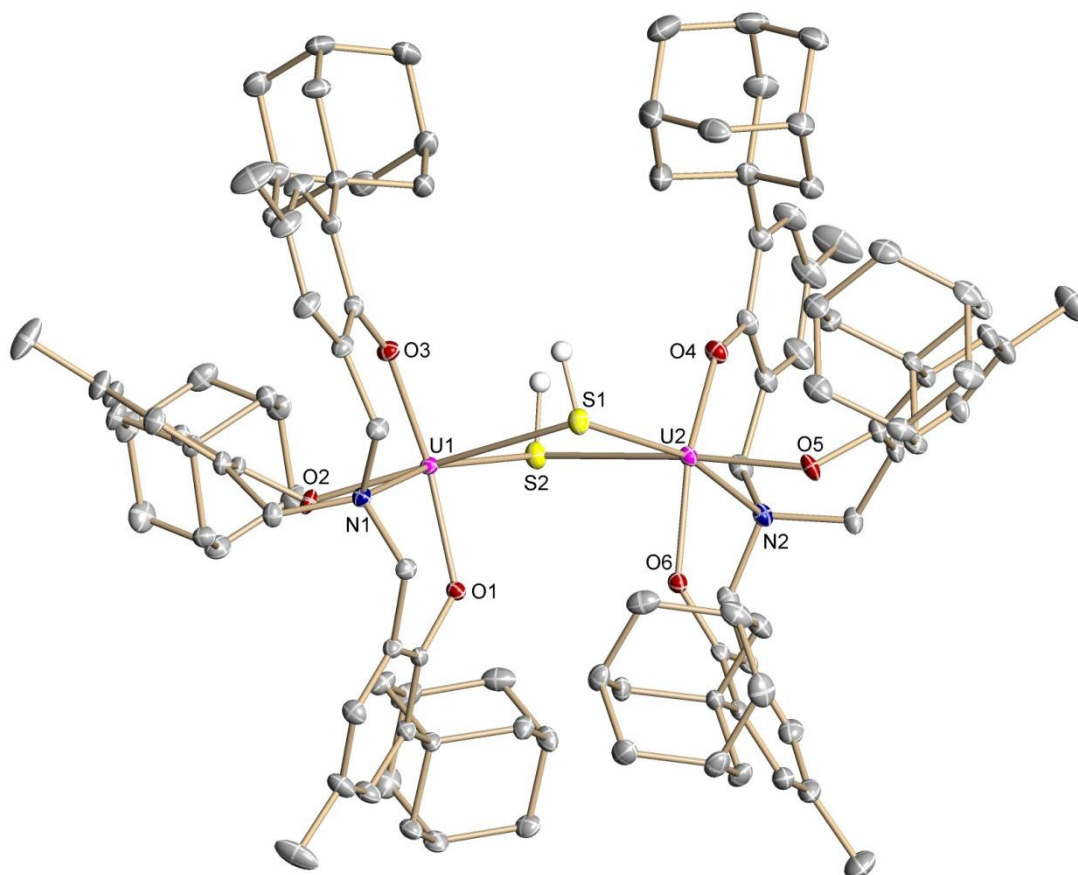

## Crystal data and structure refinement for 2-SH.

|                                   |                                                                                                            |
|-----------------------------------|------------------------------------------------------------------------------------------------------------|
| Identification code               | sf04                                                                                                       |
| Empirical formula                 | C <sub>124.50</sub> H <sub>154.50</sub> N <sub>2</sub> O <sub>6</sub> S <sub>2</sub> U <sub>2</sub>        |
| Formula weight                    | 2315.18 g/mol                                                                                              |
| Temperature                       | 100(2) K                                                                                                   |
| Wavelength                        | 0.71073 Å                                                                                                  |
| Crystal system, space group       | Triclinic, P-1                                                                                             |
| Unit cell dimensions              | a = 11.1756(16) Å   α = 85.233(5)°<br>b = 16.817(2) Å   β = 87.451(5)°<br>c = 28.662(4) Å   γ = 88.366(5)° |
| Volume                            | 5361.0(13) Å <sup>3</sup>                                                                                  |
| Z, Calculated density             | 2, 1.434 Mg/m <sup>3</sup>                                                                                 |
| Absorption coefficient            | 3.112 mm <sup>-1</sup>                                                                                     |
| F(000)                            | 2359                                                                                                       |
| Crystal size                      | 0.40 x 0.26 x 0.14 mm <sup>3</sup>                                                                         |
| Theta range for data collection   | 1.22 to 29.80°                                                                                             |
| Limiting indices                  | -15 ≤ h ≤ 15, -23 ≤ k ≤ 23, -39 ≤ l ≤ 39                                                                   |
| Reflections collected / unique    | 334803 / 30030 [R(int) = 0.0427]                                                                           |
| Completeness to theta = 27.00     | 99.9 %                                                                                                     |
| Absorption correction             | Semi-empirical from equivalents                                                                            |
| Max. and min. transmission        | 0.746 and 0.587                                                                                            |
| Refinement method                 | Full-matrix least-squares on F <sup>2</sup>                                                                |
| Data / restraints / parameters    | 30030 / 3 / 1232                                                                                           |
| Goodness-of-fit on F <sup>2</sup> | 1.100                                                                                                      |
| Final R indices [I > 2σ(I)]       | R1 = 0.0257, wR2 = 0.0608                                                                                  |
| R indices (all data)              | R1 = 0.0321, wR2 = 0.0629                                                                                  |
| Largest diff. peak and hole       | 1.937 and -1.875 e. Å <sup>-3</sup>                                                                        |

## Crystal data and structure refinement for 2-SeH.

|                                   |                                                                                                           |
|-----------------------------------|-----------------------------------------------------------------------------------------------------------|
| Identification code               | sf05                                                                                                      |
| Empirical formula                 | C <sub>12</sub> H <sub>16</sub> N <sub>2</sub> O <sub>6</sub> Se <sub>2</sub> U <sub>2</sub>              |
| Formula weight                    | 2428.51 g/mol                                                                                             |
| Temperature                       | 100(2) K                                                                                                  |
| Wavelength                        | 0.71073 Å                                                                                                 |
| Crystal system, space group       | Triclinic, P-1                                                                                            |
| Unit cell dimensions              | a = 11.217(2) Å   α = 85.324(9)°<br>b = 16.815(3) Å   β = 87.434(9)°<br>c = 28.680(3) Å   γ = 88.412(16)° |
| Volume                            | 5384.5(15) Å <sup>3</sup>                                                                                 |
| Z, Calculated density             | 2, 1.498 Mg/m <sup>3</sup>                                                                                |
| Absorption coefficient            | 3.737 mm <sup>-1</sup>                                                                                    |
| F(000)                            | 2452                                                                                                      |
| Crystal size                      | 0.26 x 0.20 x 0.12 mm <sup>3</sup>                                                                        |
| Theta range for data collection   | 2.87 to 28.50°                                                                                            |
| Limiting indices                  | -15 ≤ h ≤ 15, -22 ≤ k ≤ 22, -38 ≤ l ≤ 38                                                                  |
| Reflections collected / unique    | 105025 / 27195 [R(int) = 0.0418]                                                                          |
| Completeness to theta = 27.00     | 99.8 %                                                                                                    |
| Absorption correction             | Semi-empirical from equivalents                                                                           |
| Max. and min. transmission        | 0.746 and 0.626                                                                                           |
| Refinement method                 | Full-matrix least-squares on F <sup>2</sup>                                                               |
| Data / restraints / parameters    | 27195 / 30 / 1257                                                                                         |
| Goodness-of-fit on F <sup>2</sup> | 1.075                                                                                                     |
| Final R indices [I > 2σ(I)]       | R1 = 0.0335, wR2 = 0.0656                                                                                 |
| R indices (all data)              | R1 = 0.0489, wR2 = 0.0701                                                                                 |
| Largest diff. peak and hole       | 1.226 and -1.360 e. Å <sup>-3</sup>                                                                       |

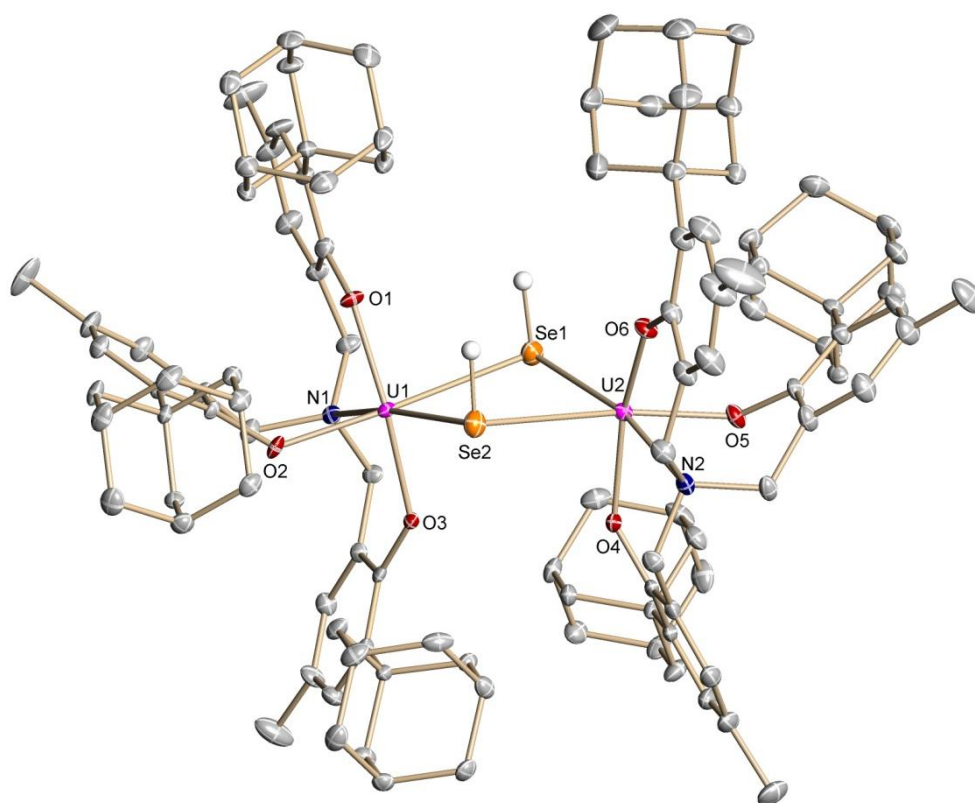

**Figure S4.** Molecular structure of **2-SeH** (top) and **2-TeH A** (bottom) with atom numbering scheme. Non-chalcogen bound H-atoms and co-crystallized solvent molecules are omitted for clarity. Thermal ellipsoids are at 50% probability.

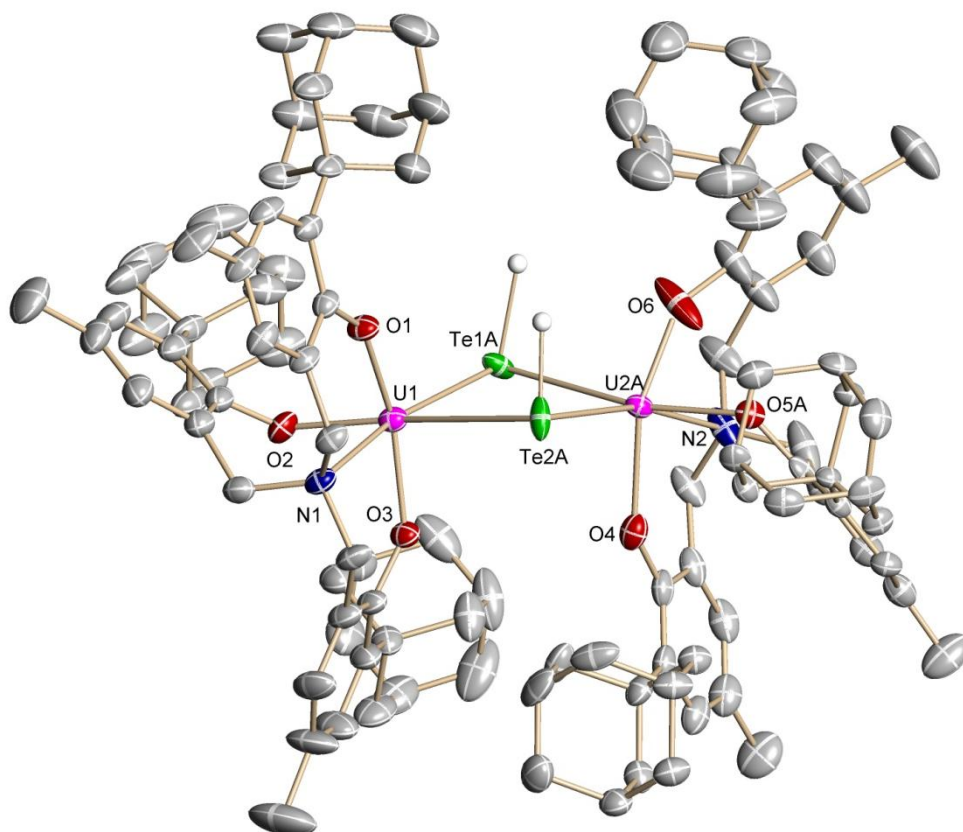

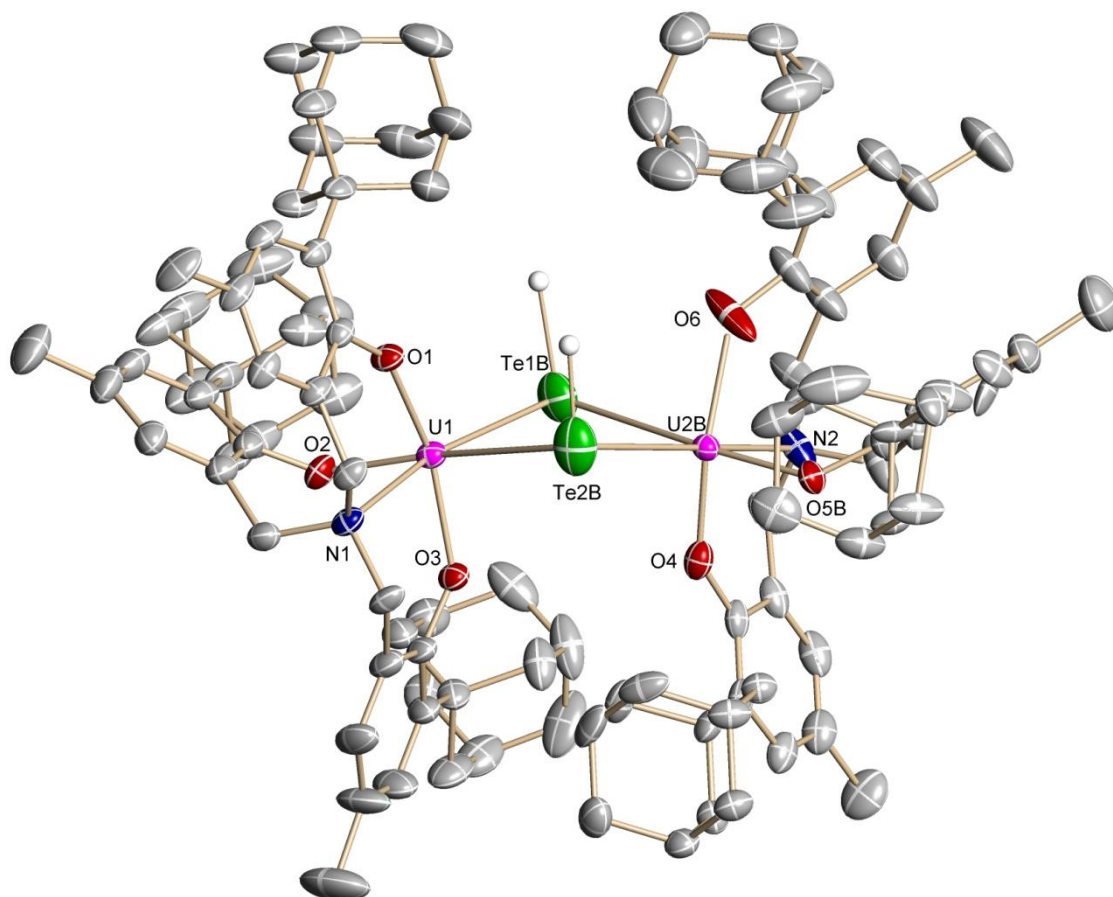

**Figure S5.** Molecular structure of **2-TeH B** with atom numbering scheme. Non-chalcogen bound H-atoms and co-crystallized solvent molecules are omitted for clarity. Thermal ellipsoids are at 50% probability.

**Table 2.** Structural Parameters for the two refined versions of **2-TeH**.

| Structural Parameters            | 1-TeH A              | 1-TeH B               |
|----------------------------------|----------------------|-----------------------|
| U–O <sub>avg.</sub>              | 2.119, 2.136         | 2.119, 2.129          |
| U–N                              | 2.558(3), 2.567(3)   | 2.558(3), 2.529(3)    |
| U <sub>1</sub> –E <sub>1,2</sub> | 3.145(2), 3.296(2)   | 3.192(2), 3.285(2)    |
| U <sub>2</sub> –E <sub>1,2</sub> | 3.163(2), 3.119(2)   | 3.372(2), 3.178(2)    |
| N–U–E                            | 171.00(7), 87.43(8)  | 169.74(8), 86.58(8)   |
|                                  | 94.94(9), 166.68(10) | 87.36(10), 173.64(10) |

## Crystal data and structure refinement for 2-TeH.

|                                   |                                                                                                                |
|-----------------------------------|----------------------------------------------------------------------------------------------------------------|
| Identification code               | sf06                                                                                                           |
| Empirical formula                 | C <sub>15</sub> H <sub>179.50</sub> N <sub>2</sub> O <sub>6.35</sub> Te <sub>2</sub> U <sub>2</sub>            |
| Formula weight                    | 2843.32 g/mol                                                                                                  |
| Temperature                       | 150(2) K                                                                                                       |
| Wavelength                        | 0.71073 Å                                                                                                      |
| Crystal system, space group       | Triclinic, P-1                                                                                                 |
| Unit cell dimensions              | a = 16.7730(6) Å   α = 105.196(6)°<br>b = 16.9230(16) Å   β = 102.968(7)°<br>c = 25.039(3) Å   γ = 101.507(5)° |
| Volume                            | 6426.8(9) Å <sup>3</sup>                                                                                       |
| Z, Calculated density             | 2, 1.469 Mg/m <sup>3</sup>                                                                                     |
| Absorption coefficient            | 3.019 mm <sup>-1</sup>                                                                                         |
| F(000)                            | 2865                                                                                                           |
| Crystal size                      | 0.40 x 0.19 x 0.14 mm <sup>3</sup>                                                                             |
| Theta range for data collection   | 2.82 to 27.10°                                                                                                 |
| Limiting indices                  | -21 ≤ h ≤ 21, -21 ≤ k ≤ 21, -32 ≤ l ≤ 32                                                                       |
| Reflections collected / unique    | 160728 / 28322 [R(int) = 0.0421]                                                                               |
| Completeness to theta = 27.00     | 99.8 %                                                                                                         |
| Absorption correction             | Semi-empirical from equivalents                                                                                |
| Max. and min. transmission        | 0.746 and 0.532                                                                                                |
| Refinement method                 | Full-matrix least-squares on F <sup>2</sup>                                                                    |
| Data / restraints / parameters    | 28322 / 419 / 1661                                                                                             |
| Goodness-of-fit on F <sup>2</sup> | 1.165                                                                                                          |
| Final R indices [I > 2σ(I)]       | R1 = 0.0360, wR2 = 0.0750                                                                                      |
| R indices (all data)              | R1 = 0.0550, wR2 = 0.0839                                                                                      |
| Largest diff. peak and hole       | 1.269 and -0.799 e. Å <sup>-3</sup>                                                                            |

# <sup>1</sup>H NMR Spectroscopy

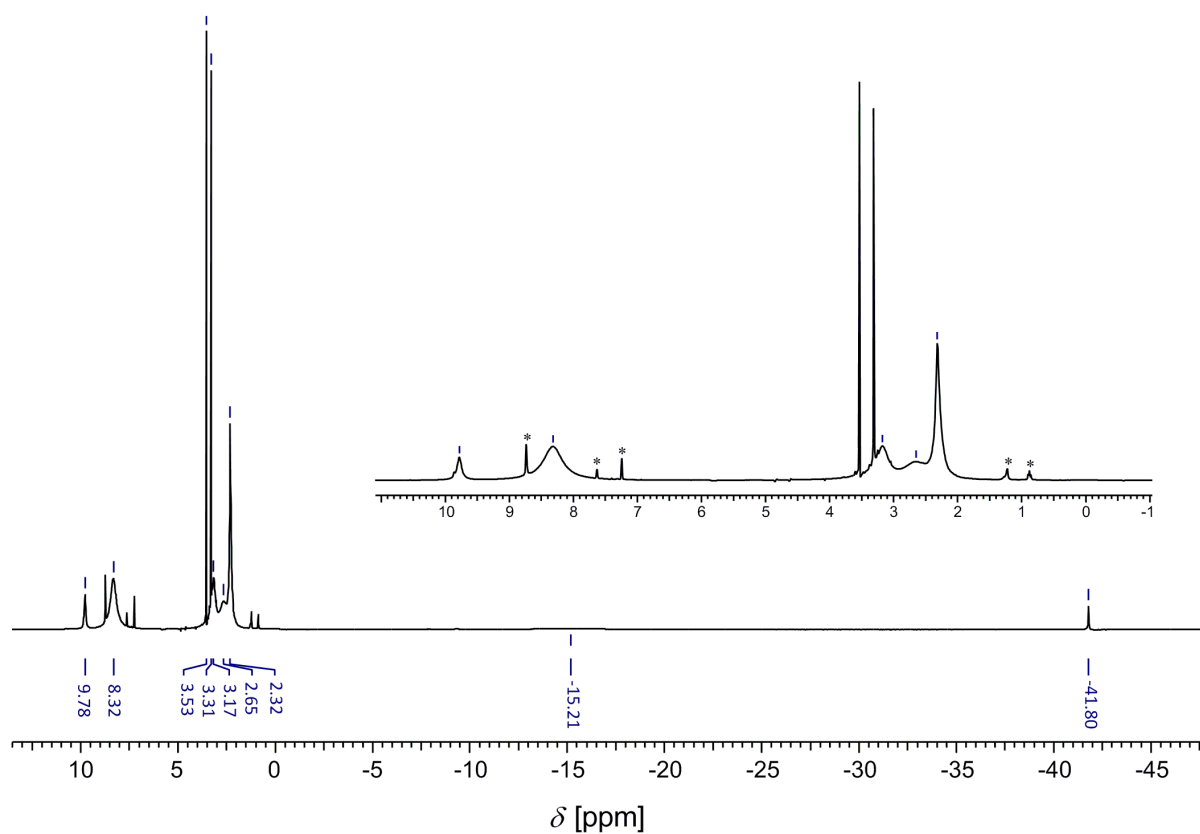

Figure S6. <sup>1</sup>H NMR spectrum of **1-SH** recorded in pyridine-*d*<sub>5</sub>.

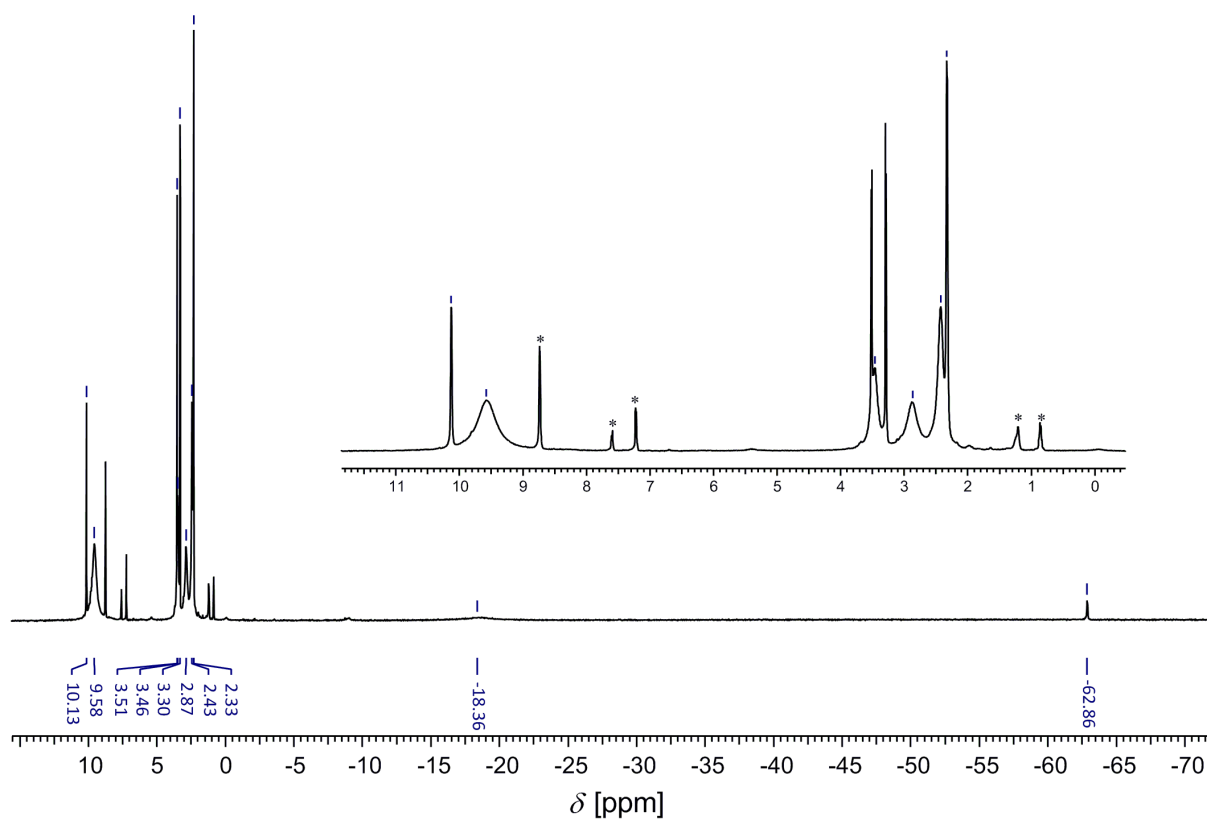

Figure S7. <sup>1</sup>H NMR spectrum of **1-SeH** recorded in pyridine-*d*<sub>5</sub>.

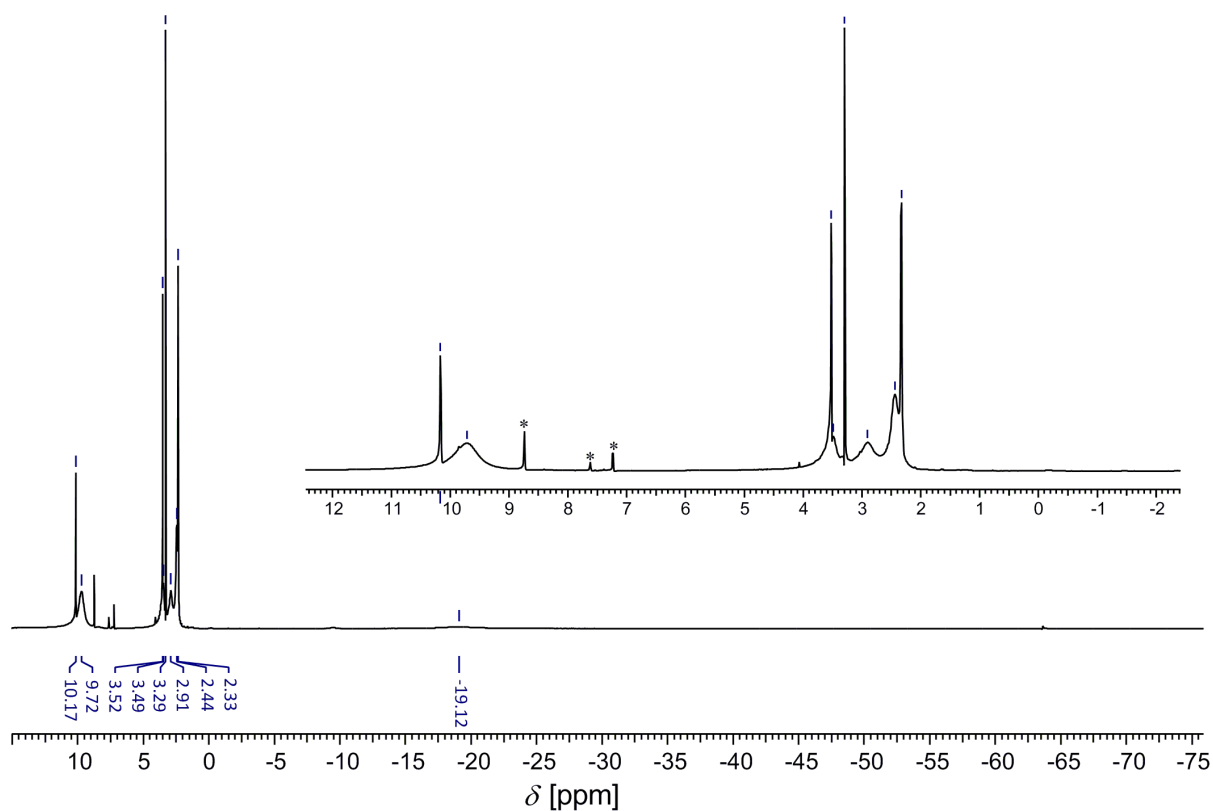

**Figure S8.**  $^1\text{H}$  NMR spectrum of **1-SeD** recorded in  $\text{pyridine-}d_5$ .

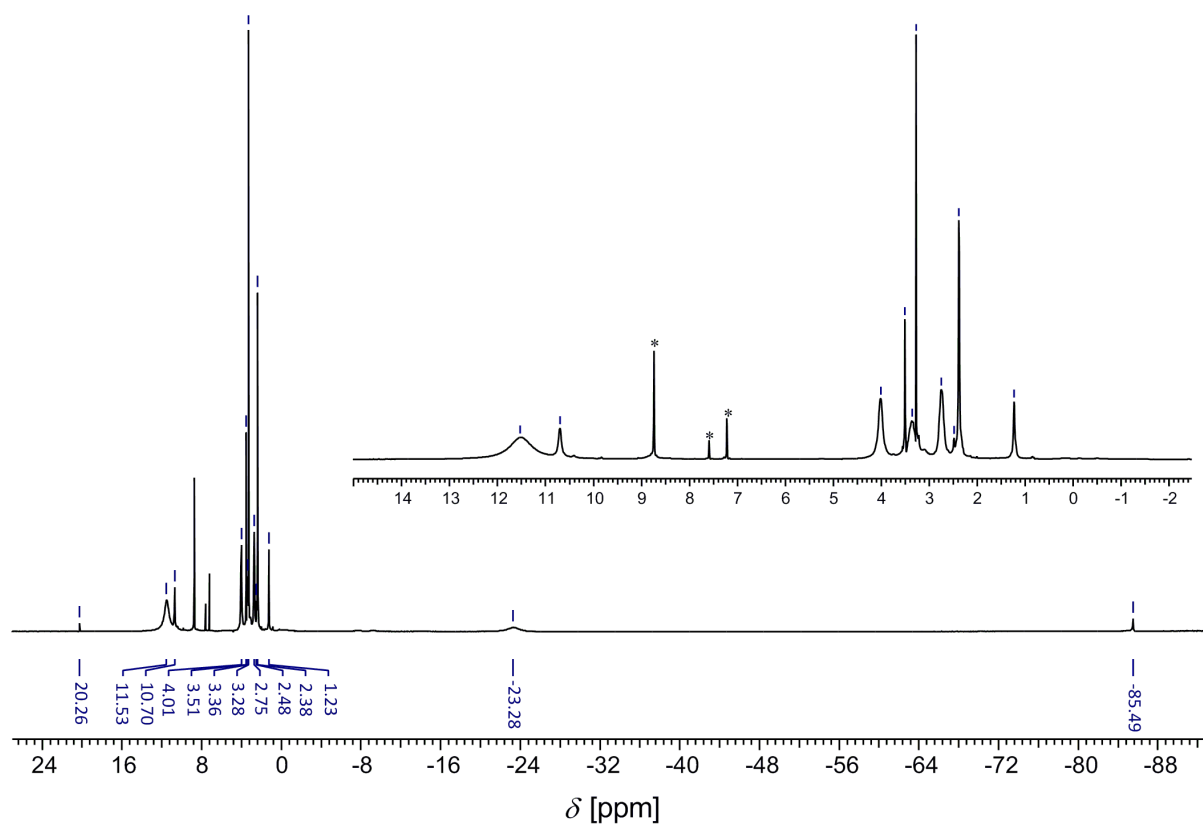

**Figure S9.**  $^1\text{H}$  NMR spectrum of **1-TeH** recorded in  $\text{pyridine-}d_5$ .

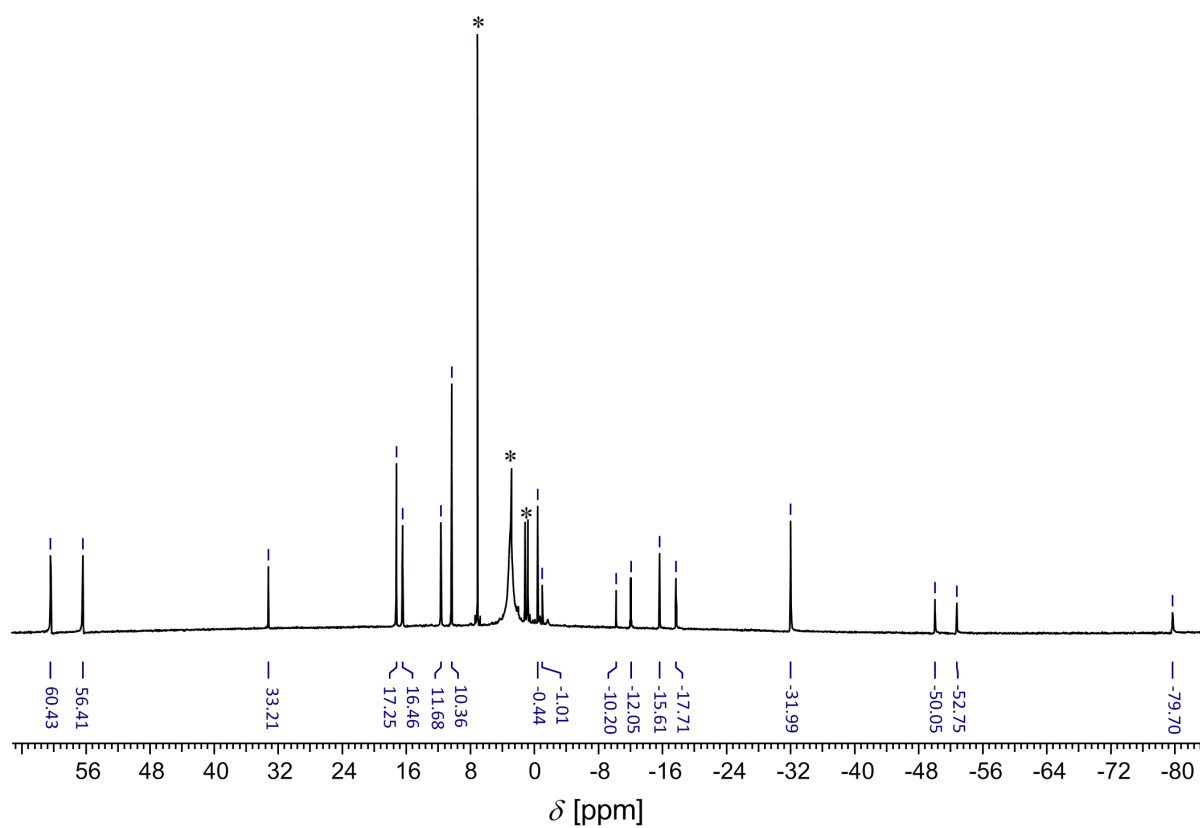

**Figure S10.**  $^1\text{H}$  NMR spectrum of **2-SH** recorded in benzene- $d_6$ .

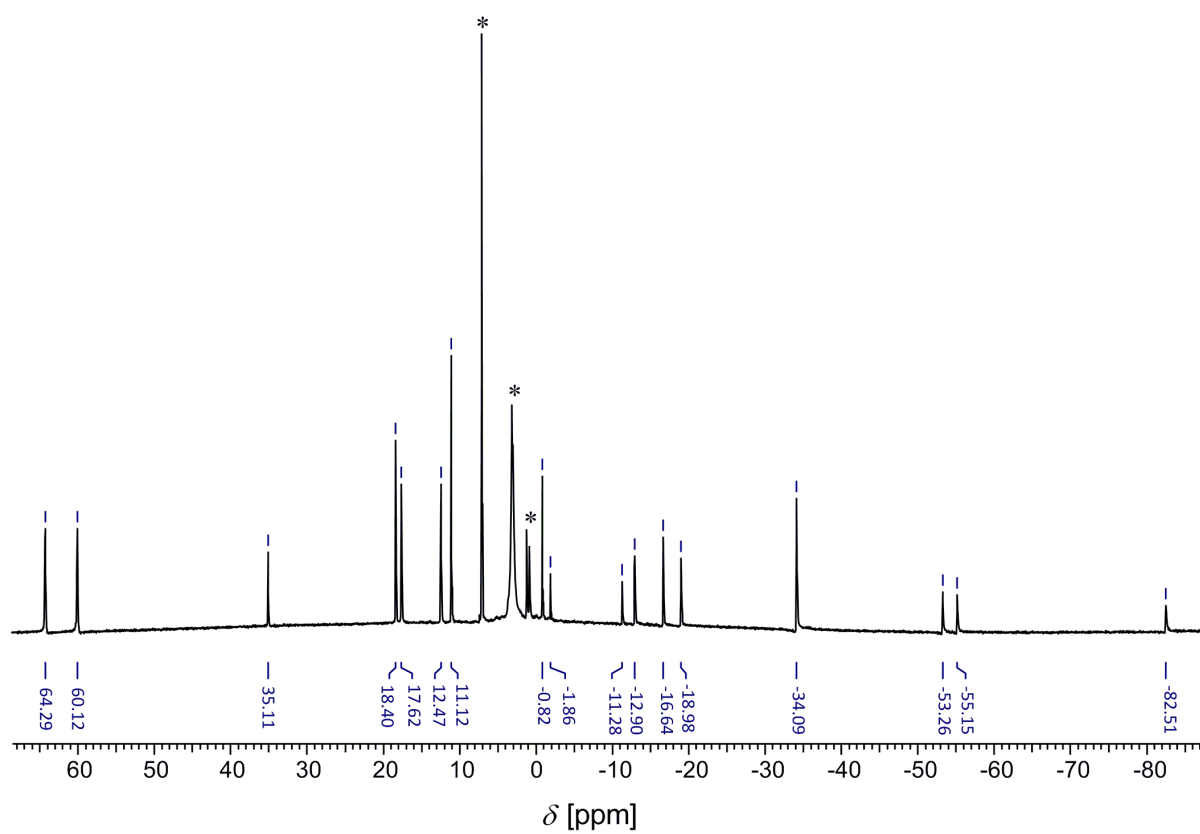

**Figure S11.**  $^1\text{H}$  NMR spectrum of **2-SeH** recorded in benzene- $d_6$ .

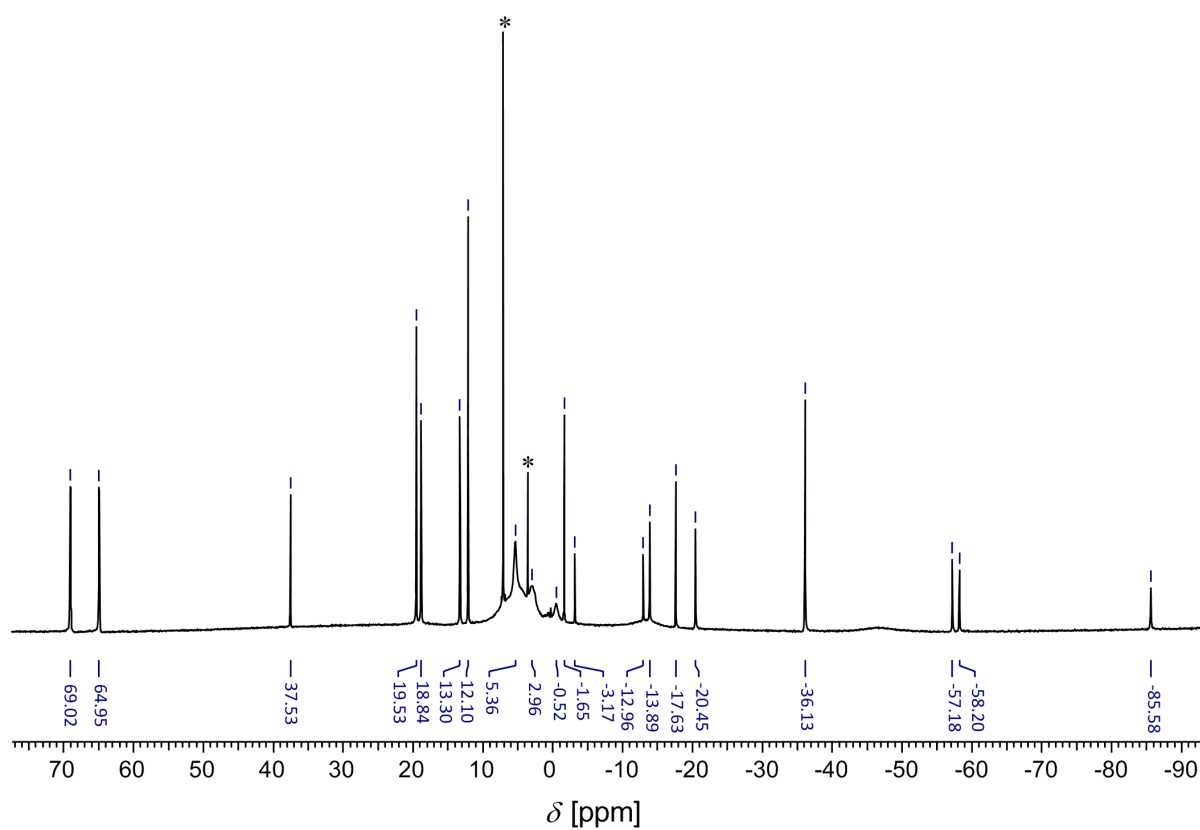

**Figure S12.**  $^1\text{H}$  NMR spectrum of **2-TeH** recorded in benzene- $d_6$ .

### $^2\text{D}$ NMR spectroscopy

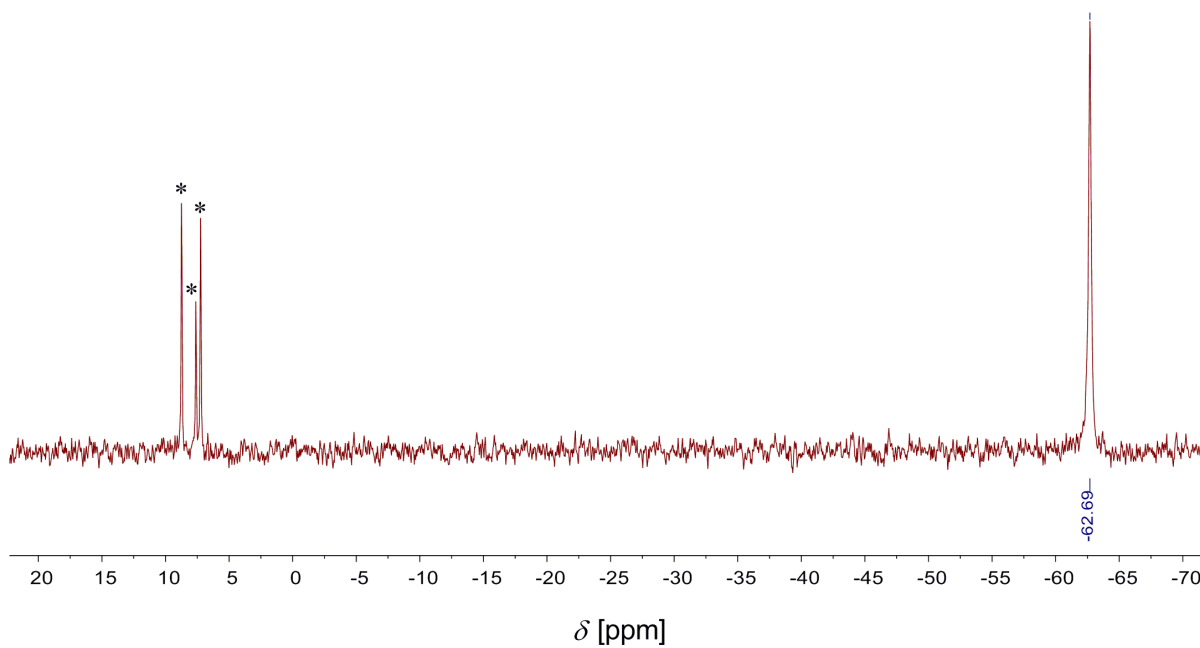

**Figure S13.**  $^2\text{H}\{^1\text{H}\}$  NMR spectrum of **1-SeD** recorded in pyridine.

## <sup>77</sup>Se NMR Spectroscopy

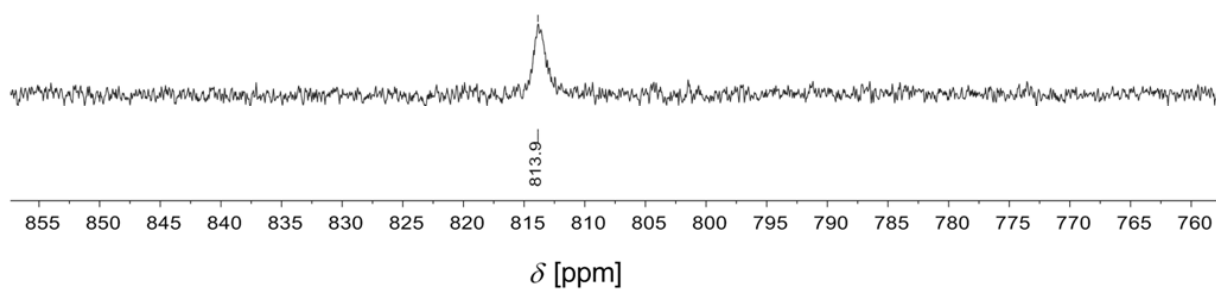

**Figure S14.** <sup>77</sup>Se NMR spectrum of **1-SeH** recorded in pyridine-*d*<sub>5</sub>.

## <sup>125</sup>Te NMR Spectroscopy

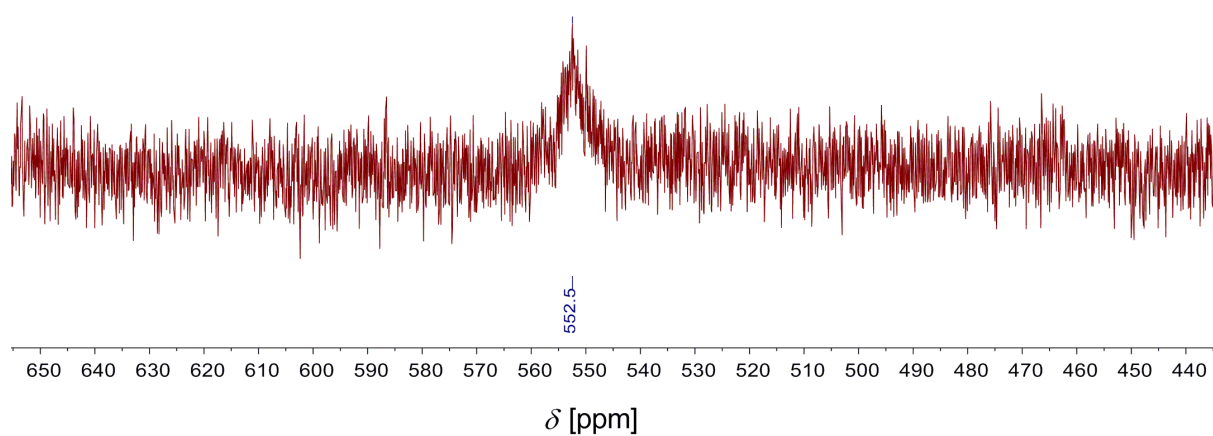

**Figure S15.** <sup>125</sup>Te NMR spectrum of **1-TeH** recorded in pyridine-*d*<sub>5</sub>.

## SQUID Magnetization Measurements

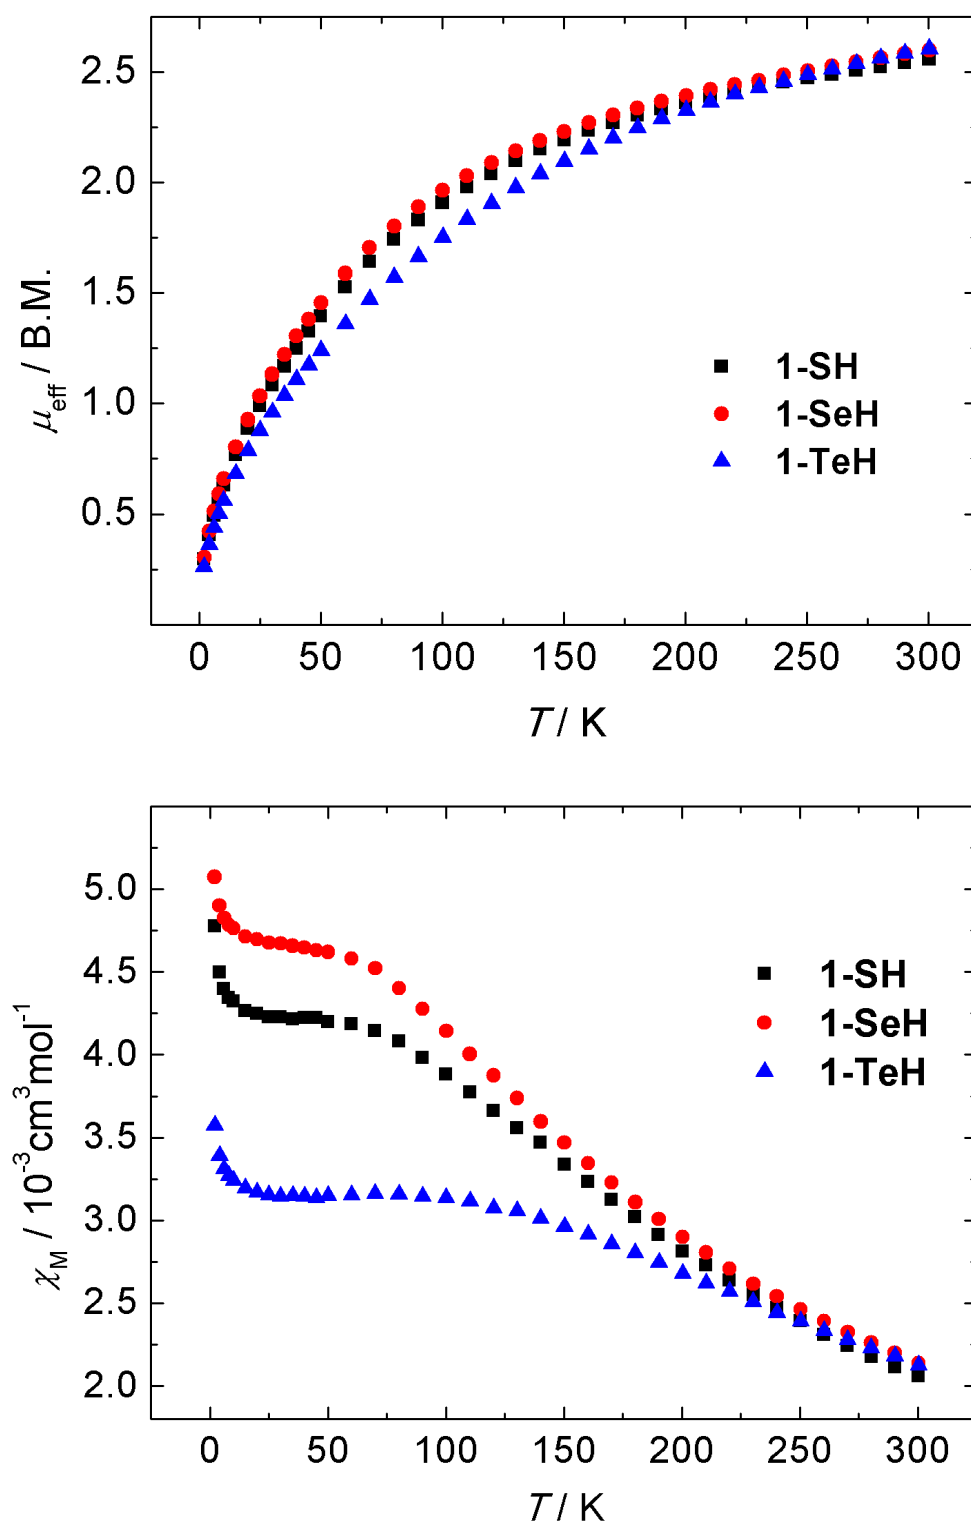

**Figure S16.** Temperature-dependent SQUID magnetization data of hydrochalcogenido complexes **1-EH** (E = S (black), Se (red), Te (blue)) as a plot of  $\mu_{\text{eff}}$  vs.  $T$  (top) and  $\chi_M$  vs.  $T$  (bottom). Data were corrected for underlying magnetism. Reproducibility was checked by at least two independently synthesized and measured samples for each compound.

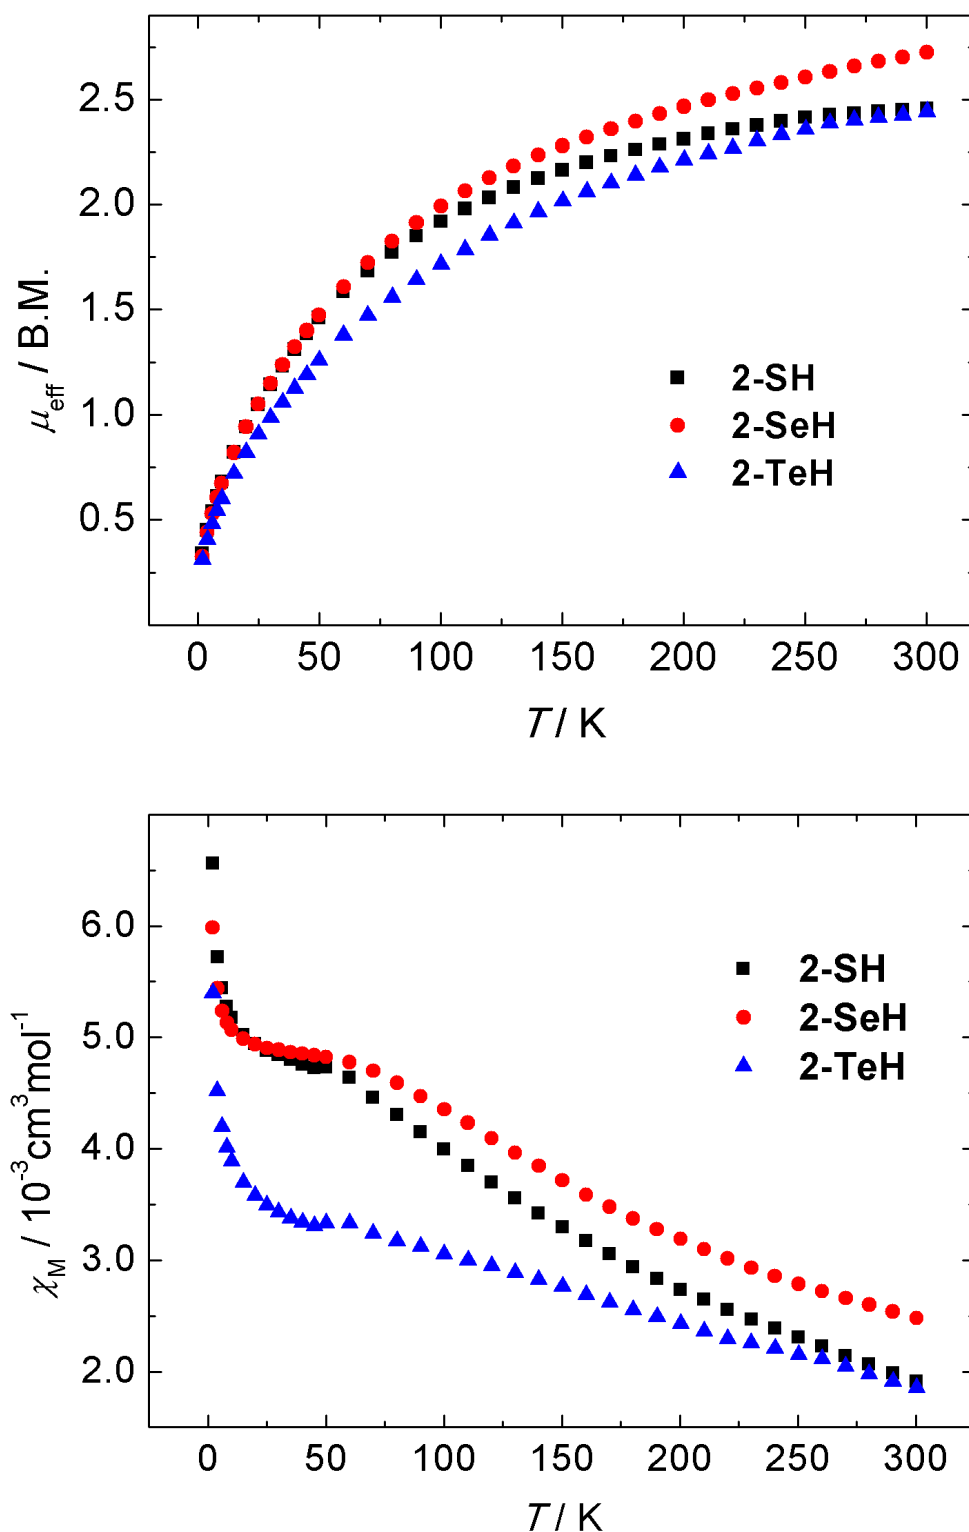

**Figure S17.** Temperature-dependent SQUID magnetization data of hydrochalcogenido complexes **2-EH** (E = S (black), Se (red), Te (blue)) as a plot of  $\mu_{\text{eff}}$  vs.  $T$  (top) and  $\chi_M$  vs.  $T$  (bottom). Data were corrected for underlying magnetism. Reproducibility was checked by at least two independently synthesized and measured samples for each compound.

### IR Spectroscopy

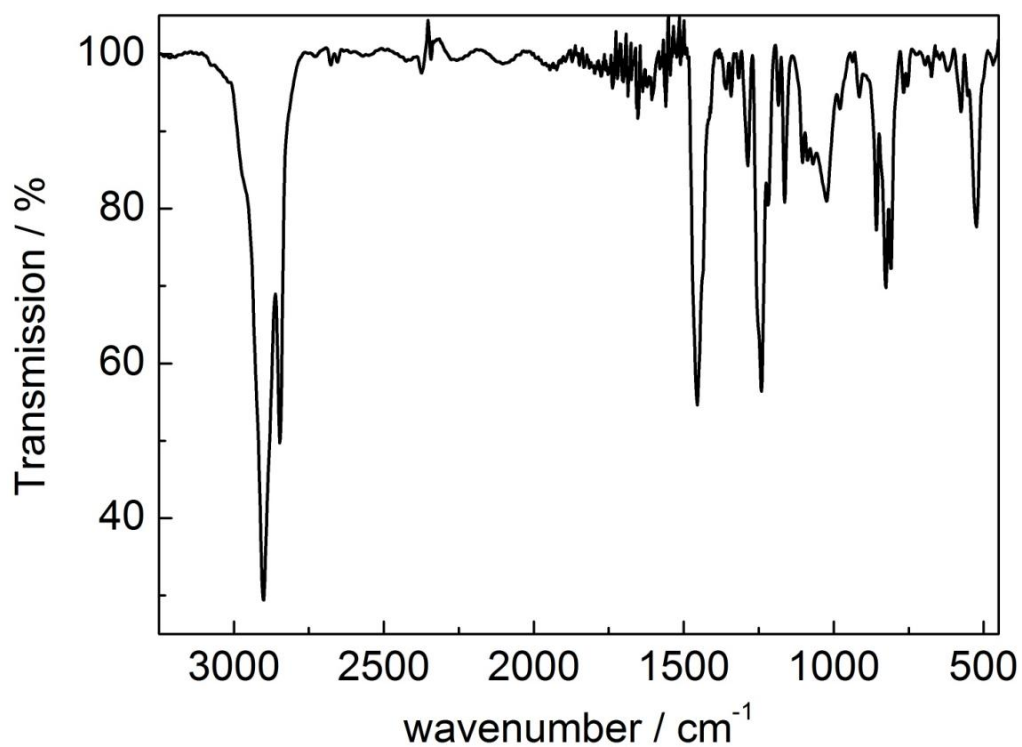

**Figure S18.** IR spectrum of **1-SH** recorded in KBr.

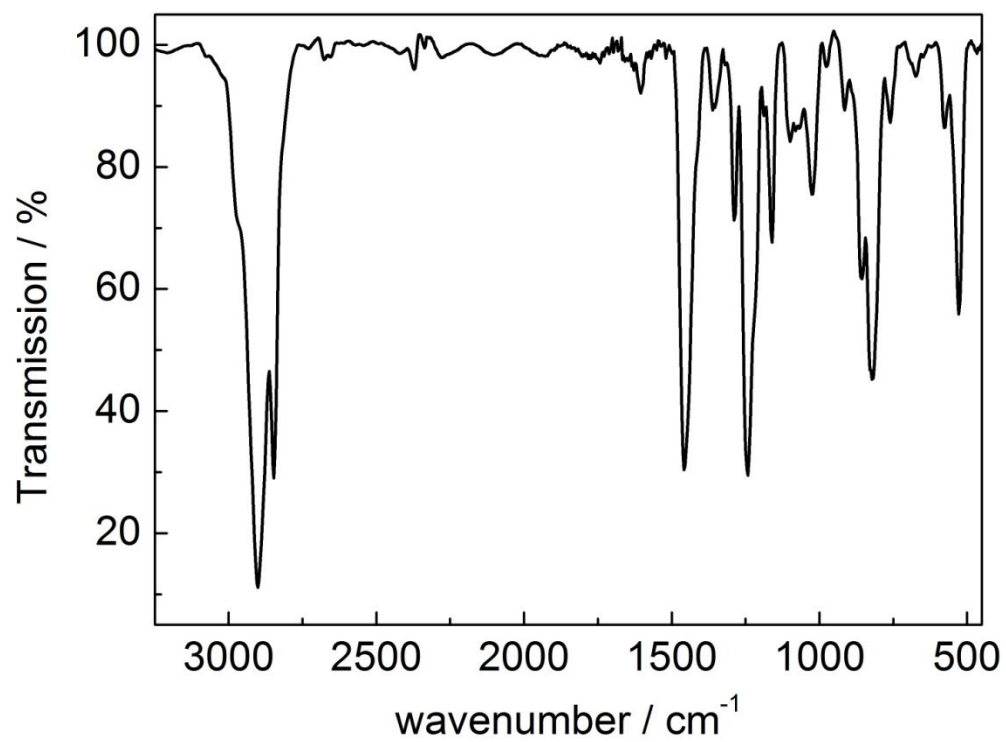

**Figure S19.** IR spectrum of **1-SeH** recorded in KBr.

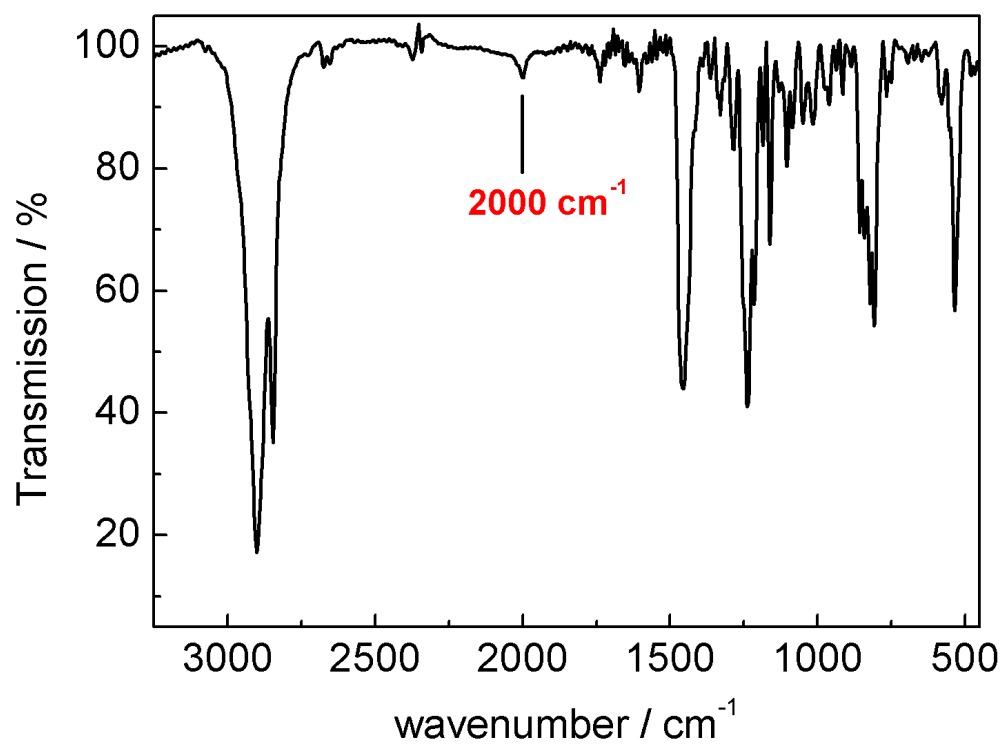

**Figure S20.** IR spectrum of **1-TeH** recorded in KBr.

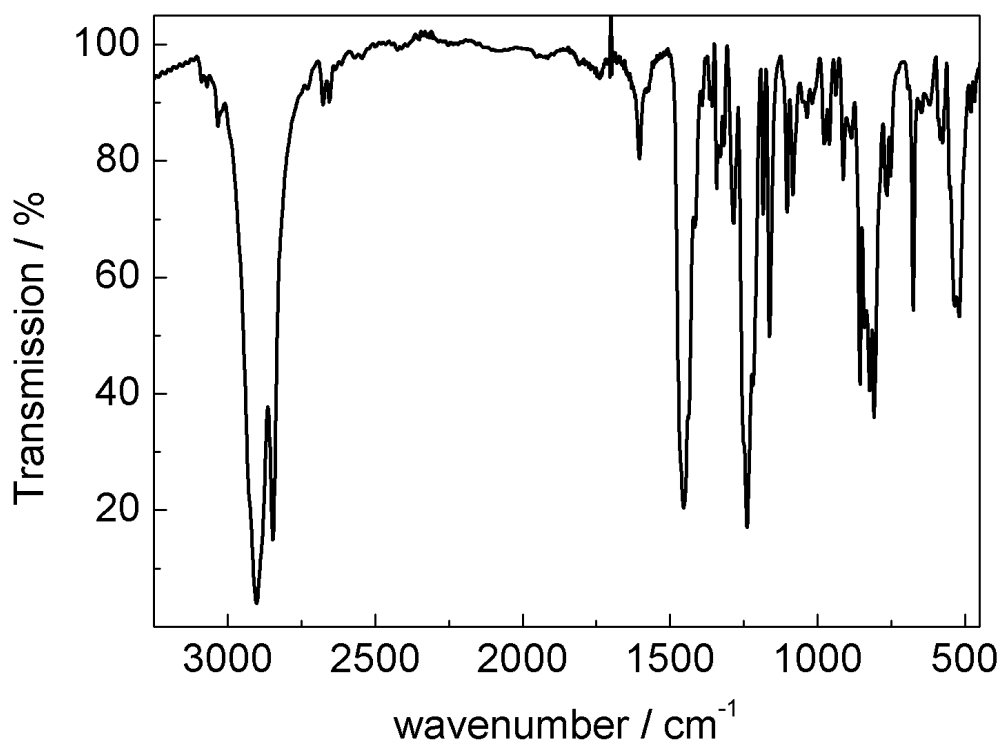

**Figure S21.** IR spectrum of **2-SH** recorded in KBr.

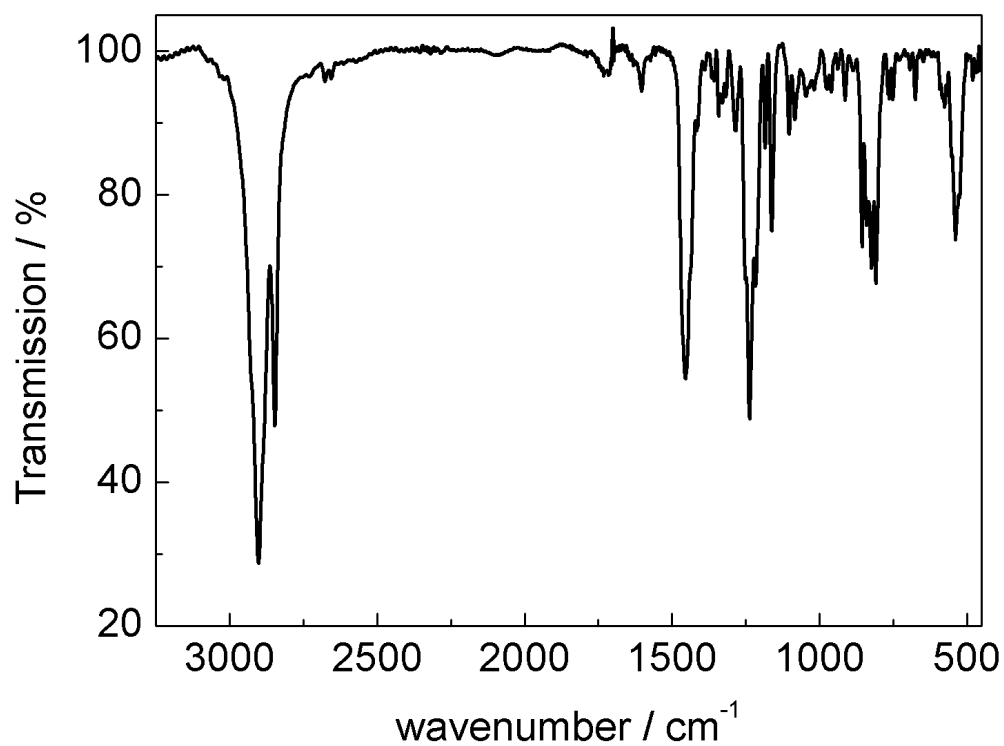

**Figure S22.** IR spectrum of **2-SeH** recorded in KBr.

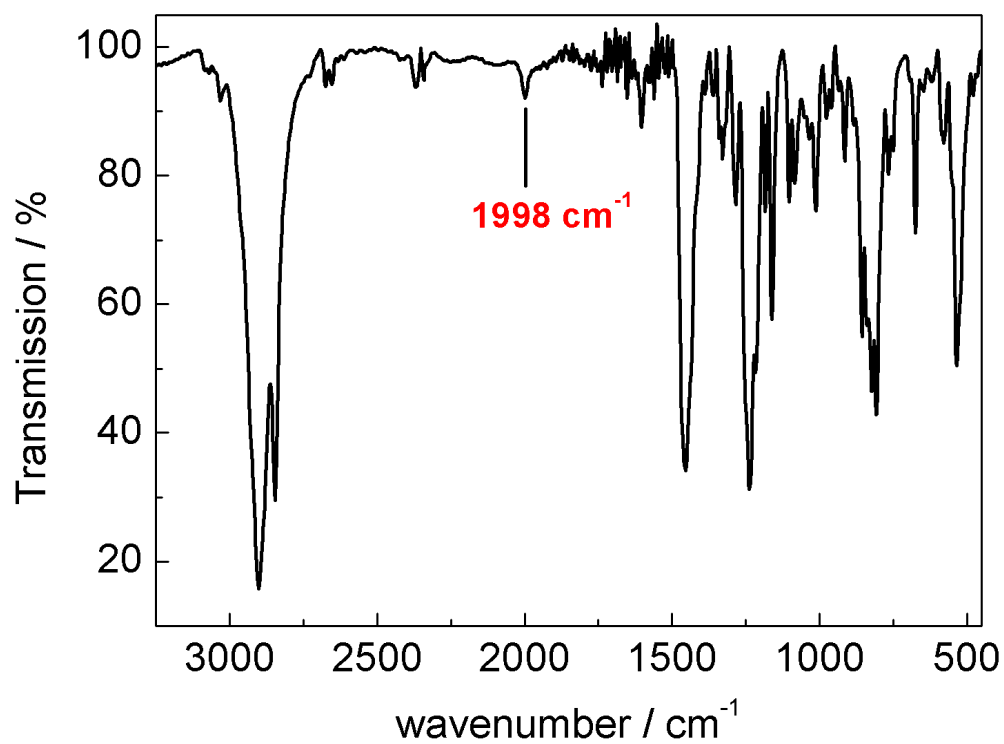

**Figure S23.** IR spectrum of **2-TeH** recorded in KBr.

### UV/vis Spectroscopy

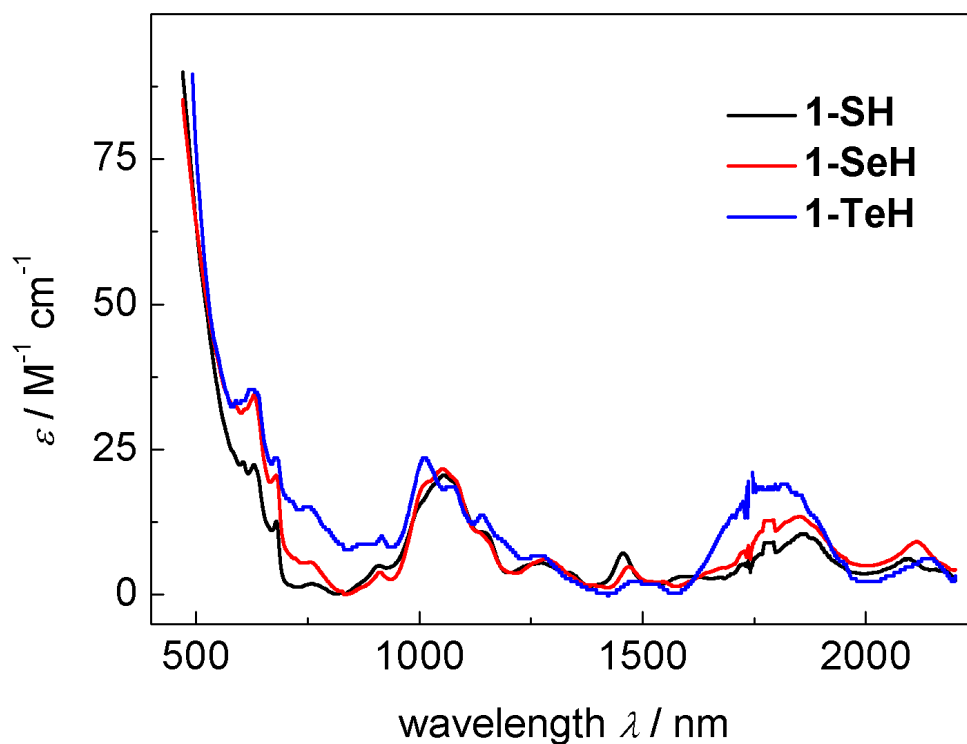

**Figure S24.** Vis/NIR spectra of hydrochalcogenido complexes **1-SH** (9.2 mM, black), **1-SeH** (9.7 mM, red), and **1-TeH** (4.1 mM, blue) recorded in DME at 25 °C.

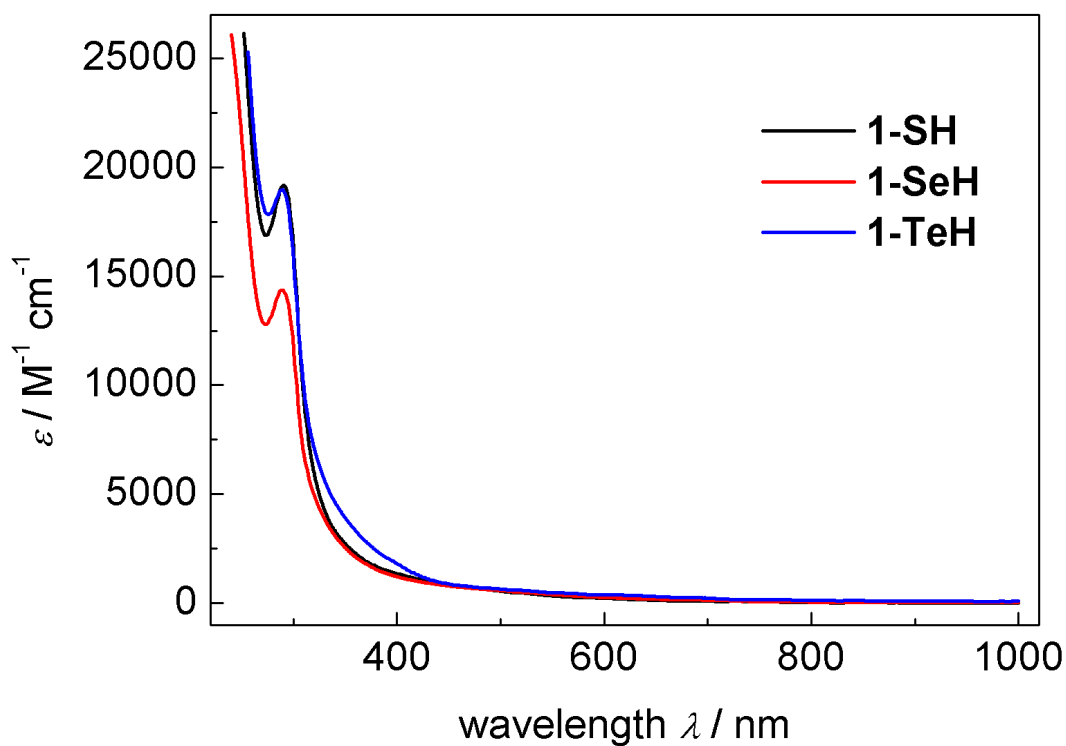

**Figure S25.** UV/vis spectra of hydrochalcogenido complexes **1-SH** ( $3.7 \times 10^{-2}$  mM, black), **1-SeH** ( $9.7 \times 10^{-2}$  mM, red), and **1-TeH** ( $4.1 \times 10^{-2}$  mM, blue) recorded in DME at 25 °C.

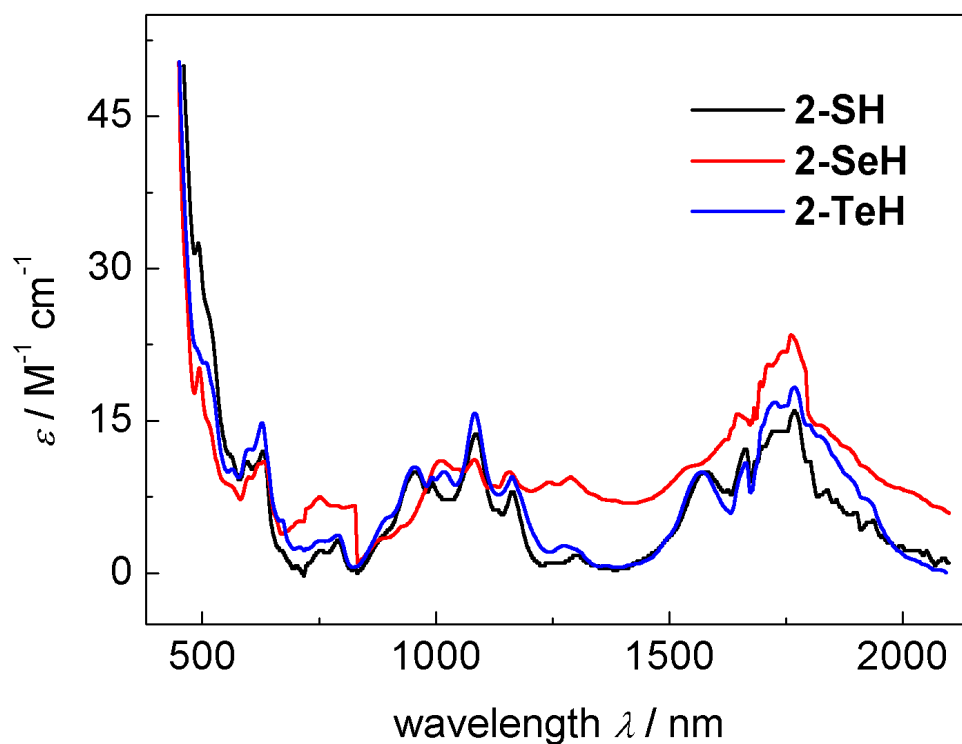

**Figure S26.** Vis/NIR spectra of hydrochalcogenido complexes **2-SH** (2.0 mM, black), **2-SeH** (6.6 mM, red), and **2-TeH** (6.5 mM, blue) recorded in benzene at 25 °C.

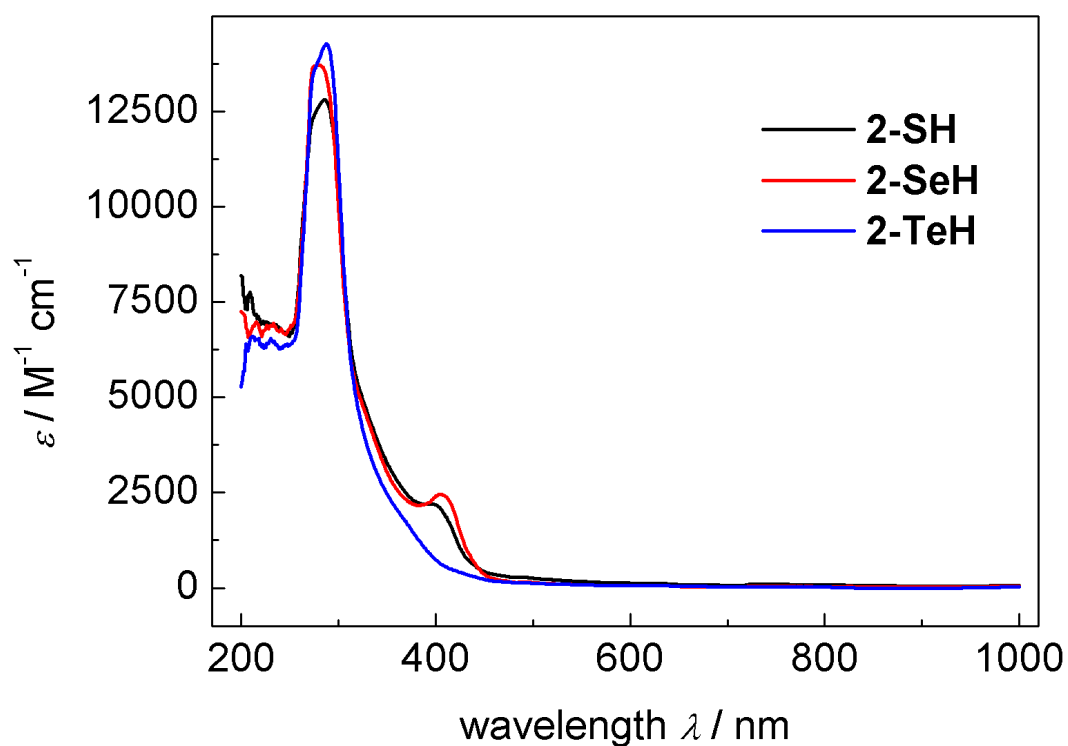

**Figure S27.** UV/vis spectra of hydrochalcogenido complexes **2-SH** ( $5.5 \times 10^{-2}$  mM, black), **2-SeH** ( $6.6 \times 10^{-2}$  mM, red), and **2-TeH** ( $6.5 \times 10^{-2}$  mM, blue) recorded in benzene at 25 °C.

## Cyclic Voltammetry

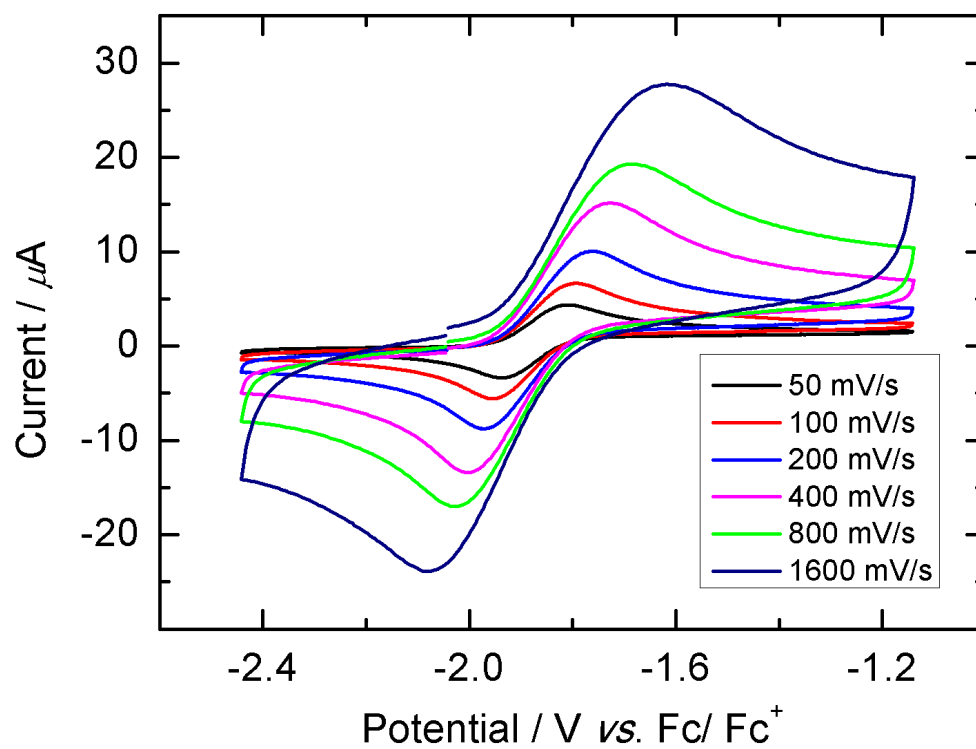

**Figure S28** Cyclic voltammogram of uranium(III) starting material  $[(^{\text{Ad}}\text{ArO})_3\text{N}]\text{U}(\text{DME})$  recorded at different scan rates in  $\sim 0.1 \text{ M } [\text{N}(n\text{-Bu})_4][\text{BPh}_4]$  in THF at room temperature.

## References

1. G. A. Bain and J. F. Berry, *J. Chem. Educ.*, 2008, **85**, 532-536.
2. M. J. Monreal, R. K. Thomson, T. Cantat, N. E. Travia, B. L. Scott and J. L. Kiplinger, *Organometallics*, 2011, **30**, 2031-2038.
3. S. A. Cortes, M. A. Muñoz Hernández, H. Nakai, I. Castro-Rodriguez, K. Meyer, A. R. Fout, D. L. Miller, J. C. Huffman and D. J. Mindiola, *Inorg. Chem. Commun.*, 2005, **8**, 903-907.
4. O. P. Lam, S. C. Bart, H. Kameo, F. W. Heinemann and K. Meyer, *Chem. Commun.*, 2010, **46**, 3137-3139.
5. M. Baudler, G. Brauer, F. Fehér, F. Huber, R. Klement, W. Kwasnik, P. W. Schenk, M. Schmeisser and R. Steudel, *Handbuch der präparativen anorganischen Chemie*, 3rd ed.; G. Brauer, Ed.; Ferdinand Enke Verlag, Stuttgart, Germany, 1975, Vol.1.
6. SADABS, *Bruker AXS Inc.*, 2008, Madison, U.S.A.
7. G. M. Sheldrick, *Acta Cryst.*, 2008, **A64**, 112 - 122.
